1 **Title: Identification of Microbiota-Induced Gene Expression Changes in the**  
2 ***Drosophila melanogaster* Head**

3

4 Scott A. Keith\*, Rory Eutsey\*, Heewook Lee<sup>†‡</sup>, Brad Solomon<sup>†‡</sup>, Stacie Oliver\*, Carl  
5 Kingsford<sup>†</sup>, N. Luisa Hiller\*, Brooke M. McCartney\*

6

7 \* Department of Biological Sciences, Carnegie Mellon University, Pittsburgh, PA 15213

8 † Computational Biology Department, Carnegie Mellon University, Pittsburgh, PA 15213

9 ‡ Equal contribution

10

11

12

13

14

15

16

17

18

19

20

21

22

23

24 **Running title:** Microbiota impact *Drosophila* head gene expression

25

26

27 **Keywords:** *Drosophila*, microbiota, gene expression, immunity, metabolism

28

29 **Corresponding author:**

30 Brooke M. McCartney

31 600D Mellon Institute

32 Department of Biological Sciences

33 Carnegie Mellon University

34 4400 Fifth Avenue

35 Pittsburgh, PA 15213

36 Phone: (412) 268-5195

37 Email: [bmccartney@cmu.edu](mailto:bmccartney@cmu.edu)

38

39

40

41

42

43

44

45

46

47 **ABSTRACT**

48 Symbiotic microorganisms exert multifaceted impacts on the physiology of their animal  
49 hosts. Recent discoveries have shown the gut microbiota influence host brain function  
50 and behavior, but the host and microbial molecular factors required to actuate these  
51 effects are largely unknown. To uncover molecular mechanisms that underlie the gut-  
52 microbiota-brain axis, we used *Drosophila melanogaster* and its bacterial microbiota as a  
53 model to identify microbiota-dependent gene expression changes in the host brain and  
54 head. Specifically, we employed RNA-seq and nanoString nCounter technology to identify  
55 *Drosophila* genes that exhibit altered transcript levels in fly heads upon elimination of the  
56 microbiota. The identified genes, some of which exhibited sex-specific differences, have  
57 demonstrated or inferred functional roles in the immune response, metabolism, neuronal  
58 activity, and stress resistance. Overall, this study reveals microbiota-responsive genes in  
59 the fly head, an anatomical structure not previously investigated in this context. Our  
60 results serve as a foundation for future investigations of how microbe-driven gene  
61 expression changes impact *Drosophila* biology.

## 62 INTRODUCTION

63           Throughout their lifespan, animals engage in complex and dynamic interactions  
64 with microbial communities that reside both in and on their bodies, and in their  
65 environment. Association with a microbiota impacts many physiological and life history  
66 traits of the animal host, and in certain environmental contexts is vitally important to  
67 supporting host health and homeostasis (McFall-Ngai *et al.* 2013). The microbial  
68 communities occupying the mammalian gut promote host immune development (Atarashi  
69 *et al.* 2011; Rosser and Mauri 2016), aid food metabolism (Cockburn and Koropatkin  
70 2016), and alter neural function and behaviors (Hsiao *et al.* 2013; Sampson and  
71 Mazmanian 2015; Sharon *et al.* 2016). In these and other ways, symbiotic  
72 microorganisms exert their influence on animal health at every hierarchical level of  
73 biological organization, ranging from the molecular to the ecological (Kohl and Carey  
74 2016). However, despite the wealth of evidence demonstrating the importance of animal-  
75 microbiota interactions, the underlying molecular and mechanistic principles of these  
76 interactions are only beginning to be uncovered.

77           *Drosophila melanogaster* and its bacterial gut symbionts provide a  
78 microbiologically and genetically controllable system with which to interrogate the  
79 molecular basis of microbiota-dependent host traits. In the lab and in the wild, *Drosophila*  
80 continuously encounter microbe-rich food substrates (Broderick and Lemaitre 2012;  
81 Wong *et al.* 2015; Bost *et al.* 2017, 2018; Adair *et al.* 2018). Unlike mammals and other  
82 higher order metazoans, the bacterial communities associated with *Drosophila* are low  
83 diversity, and are dominated by culturable taxa, predominantly *Lactobacillus* and  
84 *Acetobacter* species (Brummel *et al.* 2004; Wong *et al.* 2011, 2013, 2015; Blum *et al.*

85 2013; Broderick *et al.* 2014; Elya *et al.* 2016; Adair *et al.* 2018). Interactions between  
86 *Drosophila* and its external symbionts are also readily studied by generating sterile, germ-  
87 free (GF) flies, and gnotobiotic (GNO) flies mono- or polyassociated with defined bacterial  
88 isolates (Koyle *et al.* 2016). The microbial tractability of its gut consortium complements  
89 the abundant genetic tools that enable thorough investigation of host gene function in  
90 *Drosophila*. Thus, the ability to manipulate host genetics and its microbiota makes  
91 *Drosophila* an excellent model to study the molecular mechanisms that underlie microbial  
92 modulation of host biology.

93 The fly microbiota strongly impact a variety of physiological traits displayed by  
94 laboratory *Drosophila*. Both lactic acid and acetic acid bacteria alter the nutritional  
95 availability of particular diet substrates that enables or accelerates larval development,  
96 and shapes the metabolic profile of adults (Shin *et al.* 2011; Chaston *et al.* 2014, 2016;  
97 Huang and Douglas 2015; Matos *et al.* 2017; Storelli *et al.* 2017; Téfit and Leulier 2017;  
98 Sannino *et al.* 2018). Microbes in the gut lumen affect local gut biology by stimulating the  
99 proliferation of gut epithelial cells (Buchon *et al.* 2009; Jones *et al.* 2013, 2015; Li *et al.*  
100 2016; Petkau *et al.* 2017), driving reactive oxygen species production (Jones *et al.* 2013,  
101 2015; Guo *et al.* 2014), modulating innate immune activity (Ryu *et al.* 2008; Lee *et al.*  
102 2013; Broderick *et al.* 2014; Combe *et al.* 2014; Sansone *et al.* 2015), and protecting  
103 against stressors like pathogens and oxidative injury (Ryu *et al.* 2008; Blum *et al.* 2013;  
104 Jones *et al.* 2013, 2015; Sansone *et al.* 2015). Newly emerging evidence is connecting  
105 the bacterial microbiota with fly behavior and neural function. Flies demonstrate modified,  
106 olfactory-mediated feeding and egg-laying preferences in response to individual bacteria,  
107 mixed microbial communities, and microbial fermentation products (Farine *et al.* 2017;

108 Fischer *et al.* 2017; Kim *et al.* 2017; Leitão-Gonçalves *et al.* 2017; Liu *et al.* 2017; Wong  
109 *et al.* 2017). Adult GF *Drosophila* exhibit increased locomotor activity, which can be  
110 suppressed by a *Lactobacillus brevis*-derived, secreted metabolic enzyme, xylose  
111 isomerase (Schretter *et al.* 2018). The ability of both *Acetobacter pomorum* and  
112 *Lactobacillus plantarum* to promote larval development on nutrient-limited diets requires  
113 induction of *Drosophila* insulin-like peptides (Shin *et al.* 2011; Storelli *et al.* 2011), which  
114 are synthesized by neuroendocrine insulin-producing cells (IPCs) in the brain and  
115 released into circulation to induce systemic developmental and metabolic phenotypes  
116 (Géminard *et al.* 2009; Nässel and Broeck 2016). Reciprocally, genetic induction of  
117 tumors in the optic lobes of the larval brain and eye-antennal discs was sufficient to  
118 perturb the structure and diversity of bacterial communities in the larval gut (Jacqueline  
119 *et al.* 2017). These discoveries suggest that modulation of neuronal function by  
120 *Drosophila*-associated gut microbes can impact a range of physiological, behavioral, and  
121 life-history traits in the insect. However, the host molecules and pathways induced by  
122 interactions with the microbiota that result in these microbe-dependent host traits remain  
123 largely undiscovered.

124 Several studies have profiled the microbiota's impact on gene expression in the  
125 adult *Drosophila* gut (Broderick *et al.* 2014; Guo *et al.* 2014; Elya *et al.* 2016; Petkau *et*  
126 *al.* 2017), embryo (Elgart *et al.* 2016), larvae (Erkosar *et al.* 2017), and whole animals  
127 (Combe *et al.* 2014; Dobson *et al.* 2016; Bost *et al.* 2017). These investigations found  
128 generally similar functional categories of genes differentially expressed under GF  
129 conditions across the indicated tissue- and sample-types, namely genes involved in  
130 innate immunity, digestion, metabolism, and cellular homeostatic pathways. Notably, all

131 but one of these reports (Bost *et al.* 2017) examined the transcriptomic effects of  
132 microbiota elimination solely in female flies. The extent to which microbial effects on  
133 global gene expression differ between sexes therefore remains minimally explored.

134 In this study, we sought to identify molecular factors underlying the microbial  
135 impacts on *Drosophila* neural function, and behavioral and physiological traits. To  
136 accomplish our objective, we screened for microbiota-induced transcriptional changes in  
137 the adult *Drosophila* head. The fly head predominantly comprises the brain, eyes,  
138 antennae, and head fat body, a major metabolic/endocrine/immune tissue. We  
139 hypothesized that the brain and fat body in particular play key, undiscovered roles in  
140 mediating microbial impacts on fly behavior and metabolism. Moreover, the head is an  
141 anatomical structure that has not been investigated previously in the context of  
142 microbiota-dependent global gene expression. We therefore conducted a two-step  
143 screen for microbiota-induced transcriptional changes in the head using RNA-seq  
144 followed by nanoString technology, and identified both sex-general and sex-specific  
145 microbe-sensitive genes. These genes are broadly classifiable by shared functional  
146 categories, including innate immunity, neural activity, oxidative stress responses, and  
147 metabolism. At the cellular and physiological levels, the microbiota's influence on some  
148 of these biological processes in the host insect is well established in the literature. Thus,  
149 some of the genes identified in this study are promising candidates that may connect  
150 specific known aspects of host function to the microbiota. In other cases, we predict that  
151 the genes identified here will lead to the discovery of new microbe-dependent facets of  
152 host biology.

## 153 **MATERIALS AND METHODS**

## 154 **Fly stocks and general rearing**

155 The primary stock used in this study was the Top Banana *Drosophila melanogaster* strain,  
156 generously provided by Michael Dickinson's lab at the California Institute of Technology.  
157 This population was caught at the Top Banana fruit stand in Seattle, Washington USA  
158 (coordinates 47°40'37.0"N 122°22'37.9"W) in September 2013. Stock cultures were  
159 reared on yeast-cornmeal-molasses food of the following recipe: vol/vol or wt/vol; 8.5%  
160 molasses, 7% cornmeal, 1.1% brewer's yeast, 0.86% agar (MoorAgar), supplemented  
161 with 0.27% propionic acid (Sigma) and 13.5 mL/L of 20% methylparaben (Sigma)  
162 dissolved in 95-100% ethanol at room temperature, ~25°C. All experimental cultures,  
163 derived as described in the following section, were reared in autoclaved bottles and vials  
164 of the above diet with ~0.25g autoclaved yeast granules added topically, and maintained  
165 in a light-, temperature-, and humidity-controlled incubator on a 12:12 hour light:dark cycle  
166 (lights on 8:00am, lights off 8:00pm) at 22-23°C, 70% humidity.

167 RNA-seq and nanoString experiments were conducted with Top Banana flies harboring  
168 a *Wolbachia* infection derived from the wild-caught population; RT-qPCR experiments  
169 were conducted with Top Banana cultures cleared of *Wolbachia* by rearing for two  
170 generations on indicated diet with 0.25 g/L tetracycline (Sigma), followed by >10  
171 generations on regular diet. The  $w^{1118}$  stock used in this study is *Wolbachia*-free. The  
172 *Wolbachia* status of stocks was determined by PCR amplification of the *Wolbachia*  
173 surface protein (*wsp*) gene from DNA extracts prepared from 5-10 adult flies (Table S2).

## 174 **Generation of conventional and germ-free *Drosophila* cultures**

175 Synchronous cultures were prepared by collecting embryos laid on apple juice agar plates  
176 within a 4-hour time window. Embryos were then collected in embryo wash buffer (1X



177 solution, vol/vol or wt/vol in Milli-Q H<sub>2</sub>O: 2% Triton X-100, 7% NaCl). To generate  
178 conventional cultures, approximately 150-200 embryos were transferred directly to food  
179 bottles by pipette. To generate germ-free and gnotobiotic cultures, embryos were treated  
180 for 2 minutes with 50% sodium hypochlorite, rinsed twice in 70% ethanol and twice in  
181 sterile Milli-Q H<sub>2</sub>O. Approximately 150-200 embryos were then transferred by pipette to  
182 either: i) sterile food bottles, for germ-free cultures, or ii) sterile food bottles inoculated  
183 with  $\sim 10^7$  CFU bacterial liquid culture for gnotobiotic fly cultures (see below). All  
184 manipulations were performed inside a sterile laminar flow cabinet. Bottle cultures were  
185 then incubated under conditions described above and developed to adulthood. Adult flies  
186 were collected under light CO<sub>2</sub> anesthesia on a sterilized pad 0-24 hours post-eclosion  
187 and transferred to sterile food vials with  $\sim 0.05$  g autoclaved yeast granules added, 10-20  
188 flies of the same sex per vial. For gnotobiotic flies, vials were inoculated with  $\sim 10^7$  CFU  
189 bacterial liquid culture prior to collecting adult flies (see below). Microbial status of  
190 gnotobiotic cultures and sterility of germ-free cultures were routinely checked by  
191 homogenizing 5-10 flies in phosphate buffer saline (PBS) and plating on bacterial growth  
192 media (see below). Flies were aged in vials to 5-6 days post-eclosion for use in all  
193 experiments reported here.

#### 194 **Isolation and identification of gut bacteria from conventional Top Banana flies**

195 Bacteria were collected from either surface-sterilized whole flies or dissected guts from  
196 conventional Top Banana male and female flies. For surface sterilization, flies were  
197 washed once in 1 mL 10% sodium hypochlorite, once in 1 mL 70% ethanol, and three  
198 times in PBS. Guts (proventriculus to hindgut, excluding crop and Malpighian tubules)  
199 from 10-20 individual animals were dissected in PBS. Surface sterilized animals or

200 dissected guts were then homogenized in 100  $\mu$ L PBS and five 10-fold serial dilutions of  
201 homogenate were prepared in PBS. Dilutions were plated on MRS (Difco) and Ace (wt/vol  
202 or vol/vol: 0.8% yeast extract, 1.5% peptone, 1% dextrose, 1.5% agar, 0.3% acetic acid,  
203 0.5% ethanol) agar plates. MRS plates were sealed with parafilm and incubated at 37°  
204 for ~48 hours, and Ace plates were incubated at 30° for ~72 hours. Individual colonies of  
205 characteristic morphology were then streaked for isolation on the relevant medium. For  
206 taxon identification, the 8F and 1492R primers were used to amplify sequence from the  
207 16S rRNA gene of each isolate (Eden *et al.* 1991; Table S2). Amplicon DNA was purified  
208 and Sanger sequenced with both the forward and reverse primers. Sequencing results  
209 were then searched for highly similar sequences in both the SILVA database using the  
210 SINA alignment service (Pruesse *et al.* 2012) and the NCBI nr/nt database via blastn  
211 (Altschul *et al.* 1990; Morgulis *et al.* 2008; Camacho *et al.* 2009). Bacterial taxonomies  
212 were assigned based on >97% sequence homology (see Table S1). The 16S rRNA  
213 sequence for isolate A22 bore >97% similarity with multiple *Acetobacter* strains of  
214 different species.

### 215 **Generation of gnotobiotic *Drosophila* cultures**

216 Overnight cultures of *L. plantarum* L32 and *L. brevis* L28 were grown in MRS broth  
217 statically at 37°C, and *A. pasteurianus* A40, and *Acetobacter sp.* A22 were grown in MRS  
218 broth at 30°C with shaking. Cells were pelleted, washed twice with PBS, and resuspended  
219 in 500 $\mu$ L PBS. Cells were then diluted to a suspension of OD<sub>600</sub>=1 and five serial 10-fold  
220 dilutions were prepared. Defined volumes of each dilution were then plated on MRS or  
221 Ace agar and incubated at 37°C or 30°C for 48 hours. Colonies were then counted

222 manually and CFU/mL constants for  $OD_{600}=1$  cell suspensions were calculated for each  
223 bacterial isolate (Table S1).

224 To inoculate sterile food bottles with bacterial cell suspensions for gnotobiotic fly culture  
225 generation, overnight cultures were grown and washed in PBS as described. Cell  
226 suspensions were then diluted to a concentration of  $\sim 10^7$  cells in 150  $\mu\text{L}$  volume  
227 (calculations based on obtained CFU/mL constants). The entire 150  $\mu\text{L}$  was then pipetted  
228 directly onto the surface of sterile food bottles  $\sim 4$ -5 hours prior to addition of  
229 dechorionated, sterilized fly embryos (as described above). A cell suspension volume of  
230 50  $\mu\text{L}$  was used to inoculate vials with  $\sim 10^7$  CFU of each bacteria prior to transfer of  
231 newly-eclosed adult flies, as described above.

### 232 **RNA extraction and sequencing**

233 For each biological replicate, heads from 50 adult male flies were dissected in PBS and  
234 transferred to tubes containing 400  $\mu\text{L}$  Trizol Reagent (Invitrogen) and  $\sim 50$   $\mu\text{L}$  zirconia  
235 beads (1.0 mm). Head tissues were then immediately homogenized with a mini-  
236 beadbeater (Biospec Products) for three 30 second pulses, with 10-15 second pauses in  
237 between. RNA was then extracted using the PureLink RNA Mini Kit (Life Technologies)  
238 exactly following the kit protocol. Paired-end sequencing was conducted at the University  
239 of Southern California Molecular Genomics Core facility on an Illumina NextSeq  
240 instrument. The following read-pair counts for each sample were obtained: CV.1  
241 53638762 read pairs; CV.2 44963314 read pairs; CV.3 45583437 read pairs; GF.1  
242 42930013 read pairs; GF.2 46242287 read pairs; GF.3 51418597 read pairs. Raw read  
243 data were provided to C. Kingsford's group at Carnegie Mellon for analyses described  
244 below.

## 245 **RNA-Seq data analysis**

246 Transcript expression quantification estimates were generated using Salmon (Patro *et al.*  
247 2017) version 0.6.0 using Release-84 of Ensembl's *Drosophila melanogaster* cDNA  
248 library as a reference index. Each paired end file set was processed individually using the  
249 variational Bayesian EM algorithm using 30 bootstrapped samples to compute  
250 abundance estimates. Transcript-level expression values were converted to gene-level  
251 expression using the biomaRt package of the Bioconductor software project (Durinck *et*  
252 *al.* 2009). Differential expression was then processed on the gene level using DESeq2  
253 (Love *et al.* 2014) on both the full dataset and for each leave-one-out analysis. A gene  
254 was defined as “differentially expressed” if it exhibited nonzero expression in both sample  
255 sets and had a Benjamini-Hochberg adjusted p-value of <0.1 (see “Results”). Tissue  
256 enrichment and Gene Ontology (GO) term enrichment analyses were conducted using  
257 the FlyMine integrated database (Lyne *et al.* 2007).

## 258 **NanoString nCounter analysis**

259 Custom barcoded nanoString probes for genes of interest and housekeeping genes were  
260 designed by nanoString Technologies (File S6, sheet “Codeset”). For each biological  
261 replicate, heads from 5-10 adult flies (males and virgin females) were removed in PBS  
262 and immediately homogenized in Trizol by bead beating, as described in “RNA extraction  
263 and sequencing”. RNA was then extracted using the Direct-zol RNA MiniPrep Kit (Zymo  
264 Research) exactly following the kit protocol. Hybridization with probe set on nCounter  
265 chips was performed following manufacturer’s protocol with 70-100ng RNA per sample.  
266 Quality assessment of raw data and normalization were performed using nSolver Analysis  
267 Software 3.0. Of note, one sample each of the following conditions were flagged by

268 nSolver QC analysis due to positive control failure: CV males, GF females, GNO females  
269 (File S6, sheet: “Raw mRNA counts”). Data from these samples were therefore excluded  
270 from subsequent analysis. For genes of interest, mRNA counts were normalized to the  
271 geometric mean of count values from each sample for the following four housekeeping  
272 genes: *14-3-3 $\epsilon$* , *Su(Tpl)*, *cyp1*, *cyp33*. As our aim was to identify strongly microbiota-  
273 responsive genes in either male or female *Drosophila* heads, and not to examine the  
274 impact of sex on expression of our genes of interest, we examined expression data across  
275 CV, GF, and GNO conditions independently for each sex. Additionally, we refined this  
276 analysis by examining the genes with the highest magnitude average expression  
277 difference, arbitrarily defined as genes with  $|2fc| > 0.4$  or  $|2fc| < -0.4$  in either the GF vs. CV  
278 or GF vs. GNO comparisons. For each gene examined, we first conducted Levene’s test  
279 for equal variance and the Shapiro-Wilk normality test. Data that met the parametric  
280 assumptions according to results of these tests ( $p < 0.05$ ) were analyzed via one-way  
281 analysis of variance (ANOVA), followed by the Tukey HSD *post hoc* test to compare  
282 means between groups. Data that did not meet assumptions of equal variance and a  
283 normal distribution were analyzed via the Kruskal-Wallis test with Dunn’s multiple  
284 comparisons test.

### 285 **RT-qPCR analysis**

286 For RT-qPCR experiments, heads were dissected and RNA extracted exactly as  
287 described in “NanoString nCounter Analysis”. Each biological replicate represented RNA  
288 extracted from heads of 10 individual animals. Pure quality RNA ( $A_{260nm/280nm} \sim 2.1$ , 400-  
289 500ng) was used as template for cDNA synthesis using the qScript cDNA synthesis kit  
290 (QuantaBio). Product from cDNA synthesis reactions was used for qPCR with the

291 PerfeCTa SYBR Green Supermix (QuantaBio) in an Applied Biosystems 7300 Real Time  
292 PCR System instrument. Primer efficiencies were calculated using LinregPCR software  
293 (Ramakers *et al.* 2003; Table S2). Data were normalized to either *Rpl32* or the average  
294 of *Rpl32* and *14-3-3ε* housekeeping genes, as indicated, and expression fold changes  
295 relative to GF were calculated using the  $2^{-\Delta\Delta Ct}$  method. Normalized data were analyzed  
296 via one-way analysis of variance (ANOVA), followed by the Tukey HSD *post hoc* test to  
297 compare means between groups. Sequences for all primers used are listed in Table S2.

### 298 **Statistical analysis**

299 The statistical methods and tests employed for each set of experiments are indicated in  
300 the relevant Methods sections and are reported in the figure legends. Analyses and figure  
301 generation were performed with R version 3.4.0 and GraphPad Prism 7 software.

### 302 **Data and reagent availability**

303 All fly stocks and bacterial isolates used in this study are available upon request. All  
304 supplemental figures and files have been deposited in figshare. Raw RNA-seq data have  
305 been deposited in the National Center for Biotechnology Information Sequence Read  
306 Archive, BioProject accession number PRJNA514099. File S1 contains gene-mapped  
307 RNA-Seq read counts (sheet “Counts”); weighted average of transcript length for each  
308 gene based on the number of reads for each transcript (sheet “Transcript length”);  
309 abundance representing transcripts per million (TPM; sheet “TPM”); and initial statistical  
310 analysis of results, as described in corresponding Results section, with genes ordered by  
311 ascending Benjamini-Hochberg adjusted p-values (sheet “Statistical comparison”). File  
312 S2 summarizes descriptive results of each leave-out analysis conducted. File S3 lists  
313 genes identified as significantly differentially expressed ( $p\text{-adj} < 0.1$ ) in  $\geq 2$  leave-out

314 analyses, i.e. genes with highest degree of statistical support. File S4 lists the 343 genes  
315 identified as significantly differentially expressed ( $p\text{-adj}<0.1$ ) in  $\geq 1$  leave-out analysis;  $p$ -  
316 adj values for each analysis conducted are provided for each gene. File S5 contains  
317 results from tissue and GO-term enrichment analyses conducted on the genes listed in  
318 File S4. File S6 contains the codeset used in nanoString experiments, raw and normalized  
319 nCounter mRNA count values, and differential expression calculated as  $\log_2$  fold change  
320 values. Table S1 lists the four bacteria isolated from CV Top Banana flies employed for  
321 GNO microbial conditions, their closest taxonomic assignment based on 16S rRNA gene  
322 sequence data, and the empirically determined CFU/mL constants utilized to equilibrate  
323 planktonic bacterial cultures for inoculation of GNO fly cultures (see Materials and  
324 Methods). Table S2 lists and provides pertinent information for all primers used in this  
325 study.

## 326 **RESULTS**

### 327 **Transcriptomic comparison of the heads of microbiota-associated and germ-free** 328 ***Drosophila***

329 To investigate whether and how microbial symbionts that primarily occupy the gut  
330 lumen alter gene expression in head tissues, we compared the head transcriptomes of  
331 CV adult male *Drosophila* to their sterile GF siblings via RNA-seq. Specifically, we  
332 collected and sequenced RNA from the heads of fifty animals per replicate, and examined  
333 three, independently reared biological replicates of each microbial condition. We initially  
334 analyzed the data by read normalization to transcripts per million (TPM) values, and  
335 comparison via the Wald Chi-squared test, with a Benjamini-Hochberg false discovery  
336 rate (FDR)-adjusted  $p$ -value cutoff of 0.1 serving as our preliminary statistical significance

337 criterion. In this primary analysis, out of 13180 genes with nonzero total read counts, we  
338 identified 50 genes as being significantly differentially expressed in the heads of GF vs.  
339 CV male *Drosophila* (File S1; Sheet “Statistical comparison”, highlighted cells). These 50  
340 genes included 14 genes that showed elevated transcript levels in GF fly heads [ $\log_2$  fold  
341 change ( $|2fc|>0$ ], and 36 genes that showed decreased transcript levels relative to CV  
342 ( $|2fc|<0$ ). Overall, the magnitude of expression differences we observed were modest: 6  
343 of the 14 elevated genes had  $|2fc|>0.5$ , and 19 of the 36 decreased genes had  $|2fc|<-0.5$ .  
344 Notably, we did not observe any gene expression changes greater than two-fold ( $|2fc|>1$   
345 or  $|2fc|<-1$ ; Figure 1A, File S1).

346 Closer, visual inspection of the data revealed a considerable degree of gene-to-  
347 gene variability in normalized expression levels across replicates for the CV condition,  
348 with each replicate displaying a distinct expression pattern (Figure S1) as revealed by  
349 principal component analyses (PCA; Figure S2). Moreover, one replicate of the GF  
350 condition (designated GF replicate 3; Figure 1B, Figure S1) showed a global expression  
351 pattern markedly distinct from the other two replicates, and our PCA supported this  
352 replicate as an extreme outlier (Figure S2). The GF outlier immediately suggested the  
353 possibility that this this sample was derived from microbe-contaminated fly cultures.  
354 However, matched-sample 16S rRNA gene sequence profiling of the dissected guts of all  
355 flies used for our RNA-seq samples does not suggest contamination of any GF samples  
356 (data available upon request). Similarly, we speculated that the considerable  
357 transcriptomic variability among CV flies could be attributable to diversity in the  
358 abundance and composition of their un-manipulated microbial communities. This  
359 possibility is consistent with the known features of the laboratory *Drosophila* gut



360 microbiota, namely its inconstancy, transiency under certain rearing conditions,  
361 dependence on the diet substrate, and high inter-generational and inter-individual  
362 compositional variability (Wong *et al.* 2011, 2013, 2015; Blum *et al.* 2013; Broderick *et al.*  
363 2014; Chaston *et al.* 2016; Elya *et al.* 2016; Early *et al.* 2017; Jacqueline *et al.* 2017). Our  
364 16S rDNA profiling of the gut microbiota of the CV samples did not reveal any substantive  
365 differences, but we cannot rule out the possibility that small populations of distinct  
366 microbial cohorts influenced the head transcriptional profiles of these samples. Moreover,  
367 the Top Banana fly stock utilized in our study harbors a *Wolbachia* infection presumably  
368 derived from the original wild-caught population (see Materials and Methods). Variable  
369 titers and cohorts of *Wolbachia* endosymbionts may constitute additional sources of  
370 variability in the transcriptomic profiles of GF and CV samples.

371         To address the potential for type II error (i.e. false-negatives) in our initial analysis,  
372 resulting from the substantial inter-replicate variability of our CV samples and the GF  
373 outlier replicate, we conducted a leave-one-out analysis for each replicate in the  
374 experiment, resulting in seven total result outputs. Importantly, the number of genes that  
375 met our significance criterion (FDR adjusted p-value<0.1) varied dramatically depending  
376 on which replicate was omitted from the analysis: for example, omission of GF replicate  
377 2 from analysis of the dataset yielded 8 total differentially expressed genes, while  
378 omission of CV replicate 1 yielded 177 significantly different genes (File S2, File S3, File  
379 S4). The number of significant genes identified in each of the six analyses were generally  
380 consistent with the grouping and distribution patterns observed in our PCA results; for  
381 example, omission of GF replicate 3, the extreme outlier GF sample, increased the  
382 number of significantly different genes to 162, compared to the other analyses.

383 From this approach, we obtained a list of 343 unique candidate genes (Figure 1B;  
384 File S4 for FDR-adjusted p-value outputs from each analysis) that were significantly  
385 altered in  $\geq$ one of our seven analyses (the analysis of the full dataset and each of the six  
386 leave-one-out analyses). Notably, most of these genes were significantly differentially  
387 expressed in only one out of seven of the analyses; 66 of the 343 candidates were  
388 significant in  $\geq$ two analyses, and only six genes were differentially expressed in all seven  
389 analyses (File S3, File S4). To begin to prioritize individual genes for subsequent analysis,  
390 we characterized the functional biological properties of these 343 candidate genes.  
391 Examination of tissue-specific expression, based on Affy Calls (“Up” vs. “Down” relative  
392 to whole-body expression levels) derived from the FlyAtlas expression database  
393 (Chintapalli *et al.* 2007), revealed that of the 343 genes, 176 genes are highly expressed  
394 in the head, 107 genes are highly expressed in the fat body (importantly, the FlyAtlas  
395 dataset reflects abdominal fat body expression, and not expression in the head-localized  
396 fat body), 99 genes are highly expressed in the eye, and 70 genes are highly expressed  
397 in the brain (Figure S3, File S5). Gene Ontology (GO) terms enriched (Holm-Bonferroni  
398 adjusted p-value $<$ 0.05) in the 248/343 genes down-regulated in GF fly heads primarily  
399 encompassed functional categories related to immune function and antimicrobial  
400 responses (Figure 1C, File S5). GO terms related to amino acid and fatty acid biosynthetic  
401 processes were also enriched within the down-regulated genes (File S5). Enriched GO  
402 terms in the 95 genes transcriptionally elevated in GF, compared to CV, heads were  
403 dominated by responses to organic chemical stimuli (Figure 1D, File S5).

404 In summary, our RNA-Seq examination of the microbiota’s impact on the head  
405 transcriptome of adult male *Drosophila* revealed a relatively small number of low-

406 magnitude gene expression changes resulting from elimination of microbes. The limited  
407 number of robustly differentially expressed genes could in part be attributed to a high  
408 degree of inter-replicate variability in the expression profiles of each CV fly sample. This  
409 explanation is supported by the substantial increase in the number of candidate genes  
410 that met our statistical cutoff depending on the exclusion of certain replicates from our  
411 analysis. Nevertheless, this initial experiment provided evidence of genes expressed in  
412 the adult *Drosophila* head that were transcriptionally responsive to sterile rearing  
413 conditions. This list of candidates formed the basis for our subsequent analyses.

#### 414 **Microbial impact on immune, metabolic, and oxidative stress response gene** 415 **expression in *Drosophila* heads identified by secondary nanoString analysis**

416 Our overall goal was to identify specific genes exhibiting microbiota-dependent  
417 expression changes in the *Drosophila* head. We reasoned that these gene identities  
418 would inform hypotheses about the molecular bases of known and novel microbiota-  
419 regulated host physiological traits, and would thereby guide subsequent mechanistic  
420 investigations into the roles of these genes within a microbial context. Given this objective,  
421 and the modest expression changes and high variance observed in our RNA-Seq results,  
422 we conducted a second round of screening on a subset of candidate genes utilizing  
423 nanoString nCounter technology. The nCounter system employs a probe-capture  
424 barcode platform for direct, digital measurement of mRNA transcripts. These features of  
425 the platform enabled us to validate putative gene expression changes via an alternative  
426 methodology that obviates the potential bias introduced by the enzymatic processing  
427 steps of library preparation. Expression differences consistently observed via both  
428 techniques (indirect, relative, genome-wide vs. direct, target-based) would therefore have

429 considerable empirical support as microbiota-affected genes. Additionally, the high-  
430 sensitivity of the automated nCounter technology afforded the potential to reveal evidence  
431 of type I (“false positive”) errors from our RNA-Seq analyses.

432 For our nCounter study we generated probes for 92 genes chosen from the 343  
433 identified candidates (File S5). Our selection criteria included statistical robustness (i.e.  
434 the genes with comparatively high support shared by multiple analyses of RNA-seq  
435 results, described above) and magnitude of putative differential expression. Further, given  
436 our aim of identifying molecular factors involved in microbiota-modulated neural function  
437 and behavioral traits, we also prioritized and selected genes implicated in fly behaviors  
438 and with known roles in the brain.

439 The multiplexed nature of the nCounter technology also allowed us to test the  
440 additional variables of a GNO microbial condition and host sex. Which bacterial taxa or  
441 cohorts of taxa, and what functional attributes of microbial populations contribute to a  
442 microbiota-dependent host trait, are crucial questions inherent to all studies of the  
443 mechanistic basis of host-microbe symbioses. Moreover, as indicated above, the  
444 microbiota of CV-reared laboratory *Drosophila* is inconstant and compositionally variable  
445 within and across fly populations. We generated flies with a standardized, GNO  
446 microbiota for examination in our nanoString experiment, to: (i) begin to identify the  
447 specific bacteria responsible for observed gene expression changes, facilitating future  
448 explorations of microbial mechanisms responsible for identified host traits, and (ii) reduce  
449 inter-sample variability in microbiota composition as a potential factor contributing to  
450 variable gene expression. Our GNO flies were reared from embryo to 5-6-day adulthood  
451 in continuous polyassociation with four bacterial strains isolated from CV Top Banana

452 cultures: *Lactobacillus brevis*, *Lactobacillus plantarum*, *Acetobacter sp.* (unresolved  
453 species/strain-level taxonomic assignment; see Materials and Methods), and *Acetobacter*  
454 *pasteurianus* (Table S1). These strains represent the bacterial taxa most commonly  
455 associated with laboratory *Drosophila* cultures (Broderick and Lemaitre 2012; Douglas  
456 2018). In addition, as noted above, reports surveying microbiota effects on *Drosophila*  
457 gene expression are dominated by studies focused solely on female flies. Our RNA-seq  
458 experiment used only male heads, and we speculated that some putative expression  
459 changes might be male-specific, or exhibit a different expression pattern in females. We  
460 therefore included both male and female flies in our nanoString study to determine  
461 whether any tested candidate genes responded differently to host microbial condition as  
462 a function of the animal's sex. In all, our final experimental matrix for nanoString analysis  
463 included heads from male and female CV, GF, and GNO flies.

464 As with our RNA-seq results, most gene expression changes observed in the  
465 nanoString study were modest. More specifically, we observed relatively few genes with  
466 high-magnitude expression differences in both GF vs. CV and GF vs. GNO comparisons  
467 (Figure 2A, 2B). For both males and females, more genes were strongly down-regulated  
468 in the heads of GF compared to microbe-associated flies than were upregulated in GF  
469 heads (Figure 2A, 2B, File S6). Notably, genes down-regulated in GF male heads were  
470 generally more strongly repressed relative to CV flies than relative to GNO flies (Figure  
471 2A; the magnitude of the blue bars exceeds that of the gray bars). Conversely, in females  
472 down-regulated genes were suppressed to a greater magnitude in relation to the GNO  
473 condition than vs. CV animals (Figure 2B; the magnitude of the gray bars exceeds that of  
474 the blue bars). These trends, in addition to specific gene expression differences (see

475 below), suggest that host sex impacts head-localized transcriptional responses to the  
476 microbial environment, consistent with previous observations in the gut (Bost *et al.* 2017).

477 The fundamental objective of our secondary nanoString screen was to identify  
478 individual genes with robust, microbiota-affected expression in either male or female  
479 *Drosophila* heads. We therefore examined the genes with the greatest magnitude of  
480 change in either the GF/CV or GF/GNO comparison (arbitrarily defined as  $|2fc| > 0.4$  or  
481  $|2fc| < -0.4$ ; 32 genes for males, 40 genes for females: File S6, sheet “Log2FoldChange”),  
482 and statistically compared the effect of the three microbial conditions on these genes  
483 separately for each sex (see Materials and Methods; File S6, sheet “Log2FoldChange”).  
484 Using this approach, we identified 19 genes that were differentially expressed ( $p < 0.05$ ) in  
485  $\geq$  one of the four comparisons: (i) male GF vs. CV, (ii) male GF vs. GNO, (iii) female GF  
486 vs. CV, (iv) female GF vs. GNO. For both males and females, a greater number of  
487 significant expression changes were observed in the GF to GNO comparison (11 genes  
488 for males, 13 genes for females) than in the GF to CV comparison (4 genes for males, 1  
489 gene for females). Six of the 19 genes were differentially expressed in both males and  
490 females, and for all six the directions of change between microbial conditions were the  
491 same in both sexes. Notably, while all 92 of the genes in our codeset were selected from  
492 our leave-out analyses-derived 343 RNA-seq candidates, most of the genes (11/19) with  
493 significant expression differences in our nanoString results were significantly different in  
494 only one leave-out analysis out of our seven total comparisons (File S6, sheet “RNAseq  
495 comparison”).

496 The genes down-regulated in the heads of both male and female GF flies relative  
497 to microbe-associated flies were dominated by immune genes (Figure 3), specifically, two

498 extracellular peptidoglycan recognition proteins (PGRPs), *PGRP-SB1* and *PGRP-SD*,  
499 and eight antimicrobial peptides (AMPS). As previously indicated, more significant  
500 expression differences were observed in the GF vs. GNO comparison than in the GF vs.  
501 CV comparison. The PGRP genes were significantly reduced exclusively in GF female  
502 compared to GNO female heads (Figure 3A, B). Four AMPs were significantly reduced  
503 only in male GF vs. male GNO heads (*DptA*, *DptB*, *Dro*, and *edin*; Figure 3F, G, H, I), and  
504 the remaining four were reduced in both male and female GF vs. GNO and/or CV heads  
505 (*AttA*, *AttB*, *AttC*, and *Mtk*; Figure 3C, D, E, J). While only these ten immune genes  
506 achieved statistical significance in  $\geq$ one comparison, the observable trend of elevated  
507 transcript levels in microbe-associated flies compared to sterile flies was consistent  
508 between sexes for all immune genes assayed (Figure 3A-J; File S6), including those with  
509 no statistically significant differences in any comparison (Figure S4). As noted in our RNA-  
510 seq results, the failure to achieve statistical significance likely reflects substantial  
511 transcript count variability among the microbe-associated conditions, as compared to the  
512 more consistent, low transcript levels detected in GF samples.

513         Seven additional genes that exhibited statistically significant responses to host  
514 microbial condition in  $\geq$ one comparison had known or predicted functions in aging,  
515 oxidative stress resistance and general detoxification, and metabolism. Interestingly,  
516 each of these genes responded to host microbial condition in a sex specific manner. The  
517 cytochrome P450 gene *cyp6a17* was elevated in GF male, but not female heads (Figure  
518 4A), while the small mitochondrial heat shock protein *Hsp22* and the serine  
519 hydroxymethyl transferase *Shmt/CG3011* were upregulated exclusively in GF females  
520 (Figure 4B, C). Conversely, four experimentally uncharacterized genes with predicted

521 metabolic functions (inferred from sequence homology and predicted domain  
522 architecture) were all down-regulated in GF vs. microbe-associated heads, again with  
523 gene-by-gene sex differences. *CG10960* (functionally annotated as involved in sugar  
524 transport), *CG4757* (inferred carboxylesterase activity), and *CG3036* (a putative anion  
525 transporter) were all suppressed in GF females, but not males (Figure 4D, E, F). Another  
526 uncharacterized gene, *CG10512*, with predicted malate dehydrogenase activity, was  
527 more highly expressed in both male and female GNO, but not CV, heads relative to GF  
528 heads (Figure 4G). An uncharacterized gene with no domain-based annotation and no  
529 experimentally determined function, *CG7296*, was also elevated in male GNO vs. GF  
530 heads (Figure 4H).

### 531 **Individual bacteria alter *Arc1* expression in the adult *Drosophila* head**

532 *Drosophila* activity-regulated cytoskeleton associated protein 1 (*Arc1*) also  
533 responded strongly to microbial condition in Top Banana heads. Specifically, we found  
534 *Arc1* was elevated approximately twofold in GF male heads compared to both CV and  
535 GNO males, and more moderately elevated in GF female compared to GNO female  
536 heads (Figure 5A). *Arc1* encodes an ~29 kDa protein evolutionarily related to  
537 retrotransposon Group-specific antigen (Gag)-like proteins. *Arc1* proteins multimerize to  
538 form capsid-like structures that facilitate intercellular mRNA transfer via exosomes at the  
539 larval neuromuscular junction (Ashley *et al.* 2018), and this mechanism is conserved in  
540 mammalian *Arc/Arg3.1* (Pastuzyn *et al.* 2018). Moreover, *Drosophila Arc1* function in a  
541 particular subset of neurons in the larval brain promotes systemic metabolic homeostasis  
542 and prevents hyperlipidemia (Mosher *et al.* 2015). These metabolic consequences of  
543 *Arc1* genetic perturbation resemble those observed in flies grown under sterile conditions



544 (Shin *et al.* 2011; Storelli *et al.* 2011; Ridley *et al.* 2012; Wong *et al.* 2014; Newell and  
545 Douglas 2014; Dobson *et al.* 2015; Huang and Douglas 2015; Chaston *et al.* 2016; Kim  
546 *et al.* 2017; Judd *et al.* 2018; Kamareddine *et al.* 2018).

547 Numerous published reports have demonstrated that association with individual  
548 bacterial species and strains is sufficient to recapitulate CV- and/or polyassociated GNO-  
549 like host molecular and physiological traits. In some examples, a mixed microbial  
550 community's impacts on the host are attributable to the activities of a specific, single  
551 community member, while in other examples monoassociation with any bacterial  
552 commensal is sufficient to recapitulate the effects of the polymicrobial community (Shin  
553 *et al.* 2011; Storelli *et al.* 2011; Newell and Douglas 2014; Elya *et al.* 2016; Daisley *et al.*  
554 2017; Téfit and Leulier 2017; Fischer *et al.* 2017; Kim *et al.* 2017; Leitão-Gonçalves *et al.*  
555 2017; Matos *et al.* 2017; Obadia *et al.* 2017; Wong *et al.* 2017; Judd *et al.* 2018; Sannino  
556 *et al.* 2018). We asked whether suppression of *Arc1* expression in the heads of CV and  
557 GNO relative to GF flies is due to association with specific bacterial taxa, or represents a  
558 generalized response to the presence of microbes. Given that our standardized,  
559 simplified, four bacteria GNO microbial community was sufficient to restore CV level  
560 expression to male flies (Figure 5A), we tested this hypothesis by focusing on these four  
561 species. Specifically, we reared Top Banana *Drosophila* cultures in monoassociation with  
562 each of the four bacteria comprising our GNO condition, and measured relative *Arc1*  
563 expression in the heads of adult male flies via RT-qPCR. Consistent with our nanoString  
564 results (Figure 5A), polyassociation with the four-species GNO community resulted in  
565 significantly decreased *Arc1* expression relative to GF heads, and monoassociation with  
566 *Acetobacter sp.*, *A. pasteurianus*, or *L. brevis* was sufficient to downregulate *Arc1* to the

567 same extent (Figure 5B). *Arc1* expression was also reduced in *L. plantarum*  
568 monoassociated heads relative to GF, but the difference was not significant (Figure 5B).  
569 These results suggest that the transcriptional downregulation of *Arc1* in the heads of GNO  
570 flies is primarily attributable to interactions with the two *Acetobacter* isolates and *L. brevis*,  
571 but not to the presence of *L. plantarum*. As each of these bacteria alone recapitulates the  
572 transcriptional difference induced by the polymicrobial community, this microbiota-  
573 dependent *Arc1* suppression may reflect a common host response to the presence of  
574 certain prokaryotic organisms.

### 575 **Microbiota-dependent gene expression changes in the *Drosophila* head are** 576 **sensitive to host genetic background**

577 Host genotype substantially affects microbial impacts on certain host traits in  
578 *Drosophila* (Brummel *et al.* 2004; Broderick *et al.* 2014; Dobson *et al.* 2015; Chaston *et*  
579 *al.* 2016; Obata *et al.* 2018). Because our gene expression screen employed the recently  
580 established wild-type *Drosophila* stock Top Banana, we asked whether select microbiota-  
581 dependent gene expression changes are unique to this genetic background, or represent  
582 more common microbial effects. To address this, we used RT-qPCR to measure relative  
583 transcript levels of three strongly microbiota-responsive genes from our screen (*Arc1*,  
584 *Hsp22*, and *DptA*) in the heads of CV-, GF-, and GNO-reared  $w^{1118}$  flies, a widely-utilized  
585 laboratory *Drosophila* wild-type stock.

586 As in Top Banana flies (Figure 5A), *Arc1* was expressed at lower levels in the  
587 heads of bacteria-associated CV and GNO male  $w^{1118}$  *Drosophila* relative to GF males  
588 (Figure 6A), however there was no difference in expression across conditions in  $w^{1118}$   
589 female heads (Figure 6B). Similarly, *Hsp22*, which exhibited female-specific elevation in

590 the heads of GF Top Banana flies compared to GNO females (Figure 4B) was unaffected  
591 in  $w^{1118}$ , showing roughly equivalent expression across all conditions (Figure 6C, D). The  
592 representative AMP gene *DptA*, showed a high fold expression change in the heads of  
593 CV and GNO  $w^{1118}$  males and females compared to their sterile siblings like in Top  
594 Banana (Figure 3F, 6E,F). However, the fold elevation relative to GF was highest and  
595 statistically significant only in GNO females (Figure 6E, F). Nonetheless, this observation  
596 was consistent with the robust AMP expression changes observed in our preceding  
597 screen results. These data provide additional support for the hypotheses that host sex  
598 and genotype are important factors governing *Drosophila*'s transcriptional response to  
599 association with the microbiota. More specifically, these data suggest that some gene  
600 expression changes identified in our screen may be sensitive to host genomic  
601 composition.

## 602 **DISCUSSION**

603 To date a variety of microbe-dependent physiological and behavioral traits have  
604 been described in *Drosophila* (Broderick and Lemaitre 2012; Martino *et al.* 2017; Douglas  
605 2018), however the host molecular processes underlying these effects are largely  
606 unknown. In this study, we utilized RNA-seq and nanoString technology to uncover  
607 microbiota-responsive genes in the adult *Drosophila* head. Our RNA-seq investigation of  
608 gene expression changes induced by GF rearing revealed a high degree of inter-replicate  
609 variability in global expression profiles, particularly among CV samples. Additionally, all  
610 putative microbiota-dependent gene expression changes we identified, in both RNA-seq  
611 and nanoString analyses, were of relatively low magnitude (Figure 1A, Figure 2). In  
612 contrast, previous studies examining microbiota-induced gene expression identified

613 stronger transcriptional differences (i.e.  $\geq$ twofold) in the adult *Drosophila* gut (Broderick  
614 *et al.* 2014; Guo *et al.* 2014; Elya *et al.* 2016; Petkau *et al.* 2017), in the embryos of sterile  
615 parents (Elgart *et al.* 2016), in third instar larvae (Erkosar *et al.* 2017), and in whole flies  
616 (Combe *et al.* 2014; Dobson *et al.* 2016; Bost *et al.* 2017). Excepting the proboscis  
617 mouthparts and anterior-most foregut epithelium, the fly head largely consists of tissues  
618 that are unlikely to directly interact with microbes. It may therefore follow that expression  
619 changes in the head, while potentially no less functionally important, would be modest  
620 compared to microbial impacts on gene expression in the gut. Moreover, the head  
621 contains multiple highly distinct cell- and tissue-types (i.e. eyes, ocelli, brain, antennae,  
622 tracheal tissue, fat body, etc). Large transcriptional changes in small cell numbers could  
623 therefore be masked by sampling whole heads. Nevertheless, our study is the first  
624 transcriptome-scale assay of microbiota-dependent gene expression in an adult fly  
625 anatomical structure distinct from the gut. This study is also noteworthy as only the  
626 second to examine microbial effects on gene expression in both male and female flies  
627 (Bost *et al.* 2017), and our findings are congruent with that report. Specifically, in both our  
628 RNA-seq results and those of Bost *et al.*, chemical response genes, including cytochrome  
629 p450-encoding genes, were the dominant functional categories upregulated in GF male  
630 animals, while immune genes constituted the major downregulated functional categories  
631 in sterile males. Moreover, our nanoString experiment revealed multiple genes that were  
632 microbiota-responsive only in one sex, consistent with the sex-specific transcriptome  
633 profiles observed by Bost *et al.* These findings emphasize host sex as a critical variable  
634 that affects molecular outcomes of host-microbe association in *Drosophila*.

635 Most of the genes revealed by our screen have known or inferred roles in immune  
636 function, metabolism, aging, and oxidative stress responses. Intriguingly, numerous  
637 published studies have provided evidence that commensal microbes also modulate each  
638 of these physiological processes; examples of these connections are described in the  
639 following sections. We propose that the genes identified here are promising candidates  
640 for future study of the functional molecular basis for known microbe-dependent  
641 *Drosophila* traits.

#### 642 **Microbiota-induced immune gene expression in the adult *Drosophila* head**

643 Innate immune genes, namely AMPs and PGRPs, were suppressed in the heads  
644 of GF compared to microbiota-associated flies in both our RNA-seq and nanoString  
645 experiments (Figure 1A, 1C, Figure 3, Figure S4). Prior transcriptomic studies have also  
646 demonstrated microbiota-driven transcriptional induction of IMD pathway genes in the  
647 adult gut and in whole animals (Ryu *et al.* 2008; Buchon *et al.* 2009; Broderick *et al.* 2014;  
648 Guo *et al.* 2014; Clark *et al.* 2015; Sansone *et al.* 2015; Dobson *et al.* 2016; Petkau *et al.*  
649 2017; Bost *et al.* 2017). Some reports suggest that this priming of intestinal immune  
650 function by the commensal microbiota is important to maintenance of gut homeostasis  
651 and protection against injury in young flies; as the animal ages, over-induction of immune  
652 responses contributes to immunosenescence, inflammation, deterioration of gut  
653 homeostasis and integrity, and ultimate mortality (Ryu *et al.* 2008; Buchon *et al.* 2009;  
654 Blum *et al.* 2013; Guo *et al.* 2014; Clark *et al.* 2015; Sansone *et al.* 2015; Li *et al.* 2016;  
655 Lindberg *et al.* 2018). Whether microbiota-induced IMD activity in adult organs and  
656 tissues other than the gut also contributes to these phenomena is not known, and our  
657 data suggest this question warrants investigation. Importantly, the differences in immune

658 gene activation we observed may reflect transcriptional changes in head cell types that  
659 most directly contact microbes, such as the labellum and anterior-most foregut, or the  
660 head fat body. While less is known about immune activity in the head fat body, the  
661 abdominal fat body is the principle site of humoral immune induction during pathogenic  
662 infection (Ferrandon *et al.* 2007). Interestingly, *DptB* (one of the AMPs that emerged from  
663 our screen) was recently shown to be highly upregulated in adult male heads following  
664 long-term-memory-inducing behavioral training paradigms, and reciprocally its  
665 expression in the head fat body was required for the formation of long-term memories  
666 (Barajas-azpeleta *et al.* 2018). Further examples in the literature also point to connections  
667 between immune pathway activity in head tissues and complex physiological and  
668 behavioral phenotypes. AMP transcription in the brain increases with age, and  
669 overexpression of IMD-regulated AMPs in the adult brain is sufficient to reduce longevity  
670 and geotactic proficiency; conversely, genetic dampening of immune activity in both the  
671 CNS and glia is sufficient to extend lifespan and climbing ability (Kounatidis *et al.* 2017).  
672 In *Drosophila* models of neurological pathology, such as Fragile X syndrome, glial activity  
673 and activation of innate immune function in the brain contributes to neurodegenerative  
674 phenotypes and disease symptoms (Cao *et al.* 2013; Petersen *et al.* 2013; O'Connor *et*  
675 *al.* 2017). Enteric infection by the pathogen *Pectinobacterium carotovora carotovora* 15  
676 also exacerbates the neurological and physiological deterioration of a *Drosophila*  
677 Alzheimer's disease model, in a manner involving hemocyte recruitment to the adult brain  
678 (Wu *et al.* 2017). Potential contributions of the commensal microbiota to these  
679 neuroimmunological processes and their impacts on animal health have not been  
680 thoroughly examined. Our observation of microbiota-induced innate immune responses

681 in the heads of adult flies may therefore have important implications for the similar  
682 physiological and life-history traits of flies.

### 683 **Modulation of aging and stress response gene expression by the microbiota**

684 Our screen also revealed microbiota-responsive genes with known roles in the  
685 oxidative stress response and in pro-longevity functions. Organisms must respond to  
686 reactive oxygen species (ROS)-induced oxidative injury throughout their lifespans. ROS  
687 are constantly generated as metabolic byproducts, and their accumulation and the  
688 consequent macromolecular damage over time is a major contributor to cellular  
689 senescence and normal aging (Johnson *et al.* 1996; Lin and Beal 2003; Ewald 2018).  
690 Accordingly, in flies and other model organisms, overexpression of genes that promote  
691 proteostasis—such as chaperones, proteasomal subunits, and reducing enzymes—curtails  
692 age-related ROS elevation and extends longevity (Lin and Beal 2003; Back *et al.* 2012;  
693 Wang *et al.* 2013). Three genes we found to have increased expression in GF fly heads  
694 in one or both screen steps, *Hsp22*, *NAD-dependent methylenetetrahydrofolate*  
695 *dehydrogenase-methenyltetrahydrofolate cyclohydrolase (Nmdmc)*, and *Ecdysone-*  
696 *induced protein 71CD/methionine-S-sulfoxide reductase A (Eip71CD/MsrA)*, all have  
697 been shown to enhance oxidative stress resistance and lifespan upon overexpression  
698 (Morrow *et al.* 2004; Roesijadi *et al.* 2007; Chung *et al.* 2010; Yu *et al.* 2015). *Hsp22*  
699 encodes a small mitochondrial chaperone that functions in the unfolded protein response,  
700 and was upregulated specifically in female GF flies in our nanoString study (Figure 4B).  
701 While it did not meet our criterion of statistical significance, *Nmdmc* was also highly  
702 upregulated, on average, in the heads of GF vs. GNO female flies in our nanoString  
703 results (File S6). This gene encodes a mitochondria-localized folate-dependent enzyme

704 involved in purine biosynthesis, and may extend lifespan by increasing mitochondrial DNA  
705 copy number through an unknown mechanism (Yu *et al.* 2015). *Eip71CD/MsrA* was  
706 among the most statistically robust genes elevated in GF vs. CV male heads in our RNA-  
707 seq screen (Figure 1A, File S1, File S3), and was the most highly upregulated (though  
708 not significantly different) gene in GF vs. GNO male heads assayed by nanoString (File  
709 S6). *MsrA* is a repair enzyme that reduces methionine-S-sulfoxide (generated by  
710 oxidative damage to proteins) to methionine, and its pan-neuronal overexpression is  
711 sufficient for enhanced longevity (Chung *et al.* 2010). Another gene of interest with  
712 putative detoxification and stress response function was *Cyp6a17*, which increased in GF  
713 male, but not female, heads compared to both CV and GNO animals (Figure 4A).  
714 *Cyp6a17* belongs to the cytochrome P450 gene family, which encodes a broad range of  
715 enzymes that oxidize toxic compounds (Bergé *et al.* 1998). In flies, *Cyp6a17* is enriched  
716 in the mushroom body of the adult brain where its activity downstream of cAMP-PKA  
717 signaling modulates temperature preference behavior via an unknown mechanism (Kang  
718 *et al.* 2011).

719 Higher basal expression of these pro-longevity genes in GF *Drosophila* may  
720 contribute to the extended lifespan that has been observed for GF animals (Petkau *et al.*  
721 2014; Clark *et al.* 2015; Fast *et al.* 2018; Iatsenko *et al.* 2018; Sannino *et al.* 2018).  
722 Interestingly, the *Drosophila* microbiota also induce secreted ROS production by  
723 enterocytes that limits the gut bacterial population size, preventing dysbiosis and  
724 premature aging (Guo *et al.* 2014; Iatsenko *et al.* 2018). Thus, the complete absence of  
725 microbes should result in less oxidative damage, and therefore less upregulation of  
726 oxidative damage counteracting genes, at least in the gut. Induction of *Nmdmc*, *Eip71CD*,



727 and *Hsp22* in the heads of GF flies must therefore occur via signals independent of  
728 microbe-induced ROS.

729         Increased expression of these stress response genes under non-stress conditions  
730 may reflect a basal susceptibility to oxidative injury in adults lacking microbial symbionts.  
731 Consistent with this, upregulation of *Cyp6a17* (and other cytochrome P450 genes  
732 observed in our RNA-seq analysis; File S5) may suggest a greater burden on the animal  
733 to detoxify ingested compounds and metabolic byproducts in the absence of microbes  
734 that normally serve this function. The baseline stressed condition may be exacerbated  
735 upon encountering environmental stressors, suggesting an explanation for the greater  
736 susceptibility of GF flies to chemical oxidative challenge (Jones *et al.* 2015; Naudin *et al.*  
737 2019). Microbiota-dependent ROS production has not been examined in tissues other  
738 than the gut, nor has there been past indication of the sex-specific effects that we  
739 observed. This suggests that there is much more to learn about the molecular  
740 mechanisms connecting the microbiota to host oxidative stress resistance and lifespan.

#### 741 **Novel microbiota-regulated metabolic genes**

742         Many of the most profound effects of the microbiota on animal physiology occur  
743 via their metabolic activities. Bacterial commensals in the mammalian gut utilize host  
744 dietary polysaccharides as carbon sources, and many of the resultant secondary  
745 metabolites are absorbed by host tissues where they can have systemic effects on  
746 multiple organ systems (Cockburn and Koropatkin 2016; Daien *et al.* 2017). Mice and  
747 rats raised GF or subjected to aggressive antibiotic regimens exhibit reduced body fat  
748 levels and a decreased basal metabolic rate (Smith *et al.* 2007). Removal of the  
749 *Drosophila* microbiota also drastically impacts host metabolic function. On nutrient-rich

750 diets, bacteria modulate the glucose content of the diet substrate influencing the  
751 metabolic and nutritional profiles of adults (Ridley *et al.* 2012; Newell and Douglas 2014;  
752 Newell *et al.* 2014; Wong *et al.* 2014; Dobson *et al.* 2015; Huang and Douglas 2015).  
753 Microbial enhancement of dietary nutritional availability, particularly B-vitamins, promotes  
754 the fitness of the host—assayed by parameters including developmental rate, adult mass,  
755 and fecundity—particularly on protein-limited diets (Storelli *et al.* 2011, 2017; Wong *et al.*  
756 2014; Leitão-Gonçalves *et al.* 2017; Matos *et al.* 2017; Bing *et al.* 2018; Sannino *et al.*  
757 2018). *Acetobacter*-derived acetic acid induces both insulin signaling and the IMD  
758 pathway to reduce hyperlipidemic phenotypes and promote fly development (Shin *et al.*  
759 2011; Hang *et al.* 2014; Kamareddine *et al.* 2018). However, host mechanisms activated  
760 by microbial depletion that yield these metabolic perturbations are unknown.

761         Second to immune activity, the GO-terms enriched among the genes  
762 downregulated in GF flies in our RNA-seq study were dominated by metabolic functions,  
763 specifically amino acid and fatty acid biosynthetic processes (File S5). This observation  
764 raises the intriguing possibility that microbe-induced expression of certain genes found  
765 here enables flies to derive the optimal nutritional benefit from their diet substrate, and  
766 potentially from dead microbial cells themselves. We also identified, via nanoString, the  
767 serine hydroxyl-methyl transferase *Shmt* and five unstudied genes with domain-based  
768 predicted functions in metabolic activity, including sugar transport and enzymatic organic  
769 chemical modifiers, which responded in both directions to elimination of the microbiota,  
770 more frequently in females than in males (Figure 4). Substantial additional work is  
771 required to investigate the uncharacterized, putative metabolic *Drosophila* genes

772 identified here as potential nodes in the complex interplay between laboratory *Drosophila*,  
773 its bacterial symbionts, sex, diet, and nutrition.

774 *Arc1* is the *Drosophila* homolog of mammalian activity-regulated cytoskeleton  
775 associated protein (ARC), a neuronal protein that is required for strengthening synaptic  
776 connections, dendrite maturation, and learning and memory formation in mice  
777 (Tzingounis and Nicoll 2006; Shepherd and Bear 2011). Genetic defects in *Arc/Arg3.1*  
778 have been connected to neurological disorders, including Alzheimer's disease and Fragile  
779 X syndrome (Park *et al.* 2008; Rudinskiy *et al.* 2012). Like its vertebrate homologues,  
780 *Drosophila Arc1* is expressed in the larval and adult brain and neuroendocrine cells  
781 (Mattaliano *et al.* 2007; Mosher *et al.* 2015). Interestingly, flies null for *Arc1* exhibit  
782 metabolic defects, specifically increased fat stores and dysregulation of central carbon  
783 metabolism (Mosher *et al.* 2015), as well as enhanced starvation resistance (Mattaliano  
784 *et al.* 2007). *Drosophila Arc1* encodes a retroviral GAG-like protein which multimerizes to  
785 form capsid-like structures. These structures mediate trans-synaptic, vesicular transfer of  
786 *Arc1* mRNA and other mRNAs at the larval neuromuscular junction (Ashley *et al.* 2018),  
787 a mechanism conserved in the vertebrate protein (Pastuzyn *et al.* 2018). Connections  
788 between the molecular mechanism of *Arc1* activity and its functions in neuronal activity  
789 and metabolism are unknown. Interestingly, in addition to our identification of *Arc1* as a  
790 microbe-responsive host gene, *Arc1* appears in several published transcriptomic datasets  
791 as among the most significantly microbiota-responsive genes. However, while we found  
792 a significant elevation of *Arc1* in the heads of GF males and females (Fig. 5A), these  
793 studies all observed a decrease in *Arc1* expression in gut or whole GF females (Guo *et al.*  
794 *et al.* 2014; Dobson *et al.* 2016; Petkau *et al.* 2017). This discrepancy may further

795 underscore the importance of tissue-specificity of microbial impacts on gene expression.  
796 Additionally, these studies were predominantly conducted in the Canton-S wild-type fly  
797 stock, and our RT-qPCR experiments conducted on *w<sup>1118</sup> Drosophila* suggest that the  
798 *Arc1* expression change may be sensitive to host genotype, sex, and/or an interaction  
799 between the two (Figure S5). Nevertheless, the potential connections between the  
800 bacterial microbiota, *Arc1* expression and function, and *Drosophila* metabolism represent  
801 a promising avenue for future investigation.

## 802 **Summary and concluding remarks**

803 Together this study has revealed genes that exhibit altered expression in the head  
804 of young adult *Drosophila* upon elimination of the microbiota. We hypothesize that some  
805 of these genes contribute to the host molecular mechanisms underlying known  
806 microbiota-impacted traits, including metabolic function, stress resistance, and aging. In  
807 addition, many genes not prioritized in our screening process nevertheless trended with  
808 differential expression patterns in our RNA-seq study, and may still represent bona fide,  
809 biologically relevant microbiota-regulated genes. Examples include genes with roles in  
810 circadian rhythms, visual and odor perception, and cellular responses to hypoxia (File  
811 S5). We predict that analysis of these gene expression changes at the tissue and cell  
812 type specific level will reveal connections between the gut microbiota and many novel  
813 aspects of host physiology and behavior.

## 814 **ACKNOWLEDGMENTS**

815 We thank members of the McCartney, Hiller, Minden, and Mitchell labs for helpful  
816 discussions during the performance of the study and preparation of this manuscript. The  
817 Top Banana fly stock was a generous gift from Dr. Michael Dickinson's lab (CalTech). Dr.

818 Carol Woolford (Mitchell lab, Carnegie Mellon University) performed the nanoString  
819 hybridizations. Dr. Anagha Kadam assisted with use of nSolver analysis software and  
820 LinRegPCR software. We would like to thank the Woolford, Mitchell, and Hinman labs  
821 and the Molecular Biosensor and Imaging Center at Carnegie Mellon University for  
822 reagents and equipment. Funding for this work was provided by a Carnegie Mellon  
823 University ProSEED/BrainHub seed grant to B.M.M., N.L.H., and C.K..

## 824 LITERATURE CITED

- 825 Adair, K. L., M. Wilson, A. Bost, and A. E. Douglas, 2018 Microbial community assembly  
826 in wild populations of the fruit fly *Drosophila melanogaster*. *ISME J.* 12: 959-972
- 827 Altschul, S. F., W. Gish, W. Miller, E. W. Myers, and D. J. Lipman, 1990 Basic local  
828 alignment search tool. *J. Mol. Biol.* 215: 403–10.
- 829 Ashley, J., B. Cordy, D. Lucia, L. G. Fradkin, V. Budnik *et al.*, 2018 Retrovirus-like Gag  
830 Protein Arc1 Binds RNA and Traffics across Synaptic Boutons. *Cell* 172: 262–  
831 270.e11.
- 832 Atarashi, K., T. Tanoue, T. Shima, A. Imaoka, T. Kuwahara *et al.*, 2011 Induction of  
833 Colonic Regulatory T Cells. *Science* 331: 337–342.
- 834 Back, P., B. P. Braeckman, and F. Matthijssens, 2012 ROS in Aging *Caenorhabditis*  
835 *elegans* : Damage or Signaling? *Oxid. Med. Cell. Longev.* 2012: 1–14.
- 836 Barajas-azpeleta, R., J. Wu, J. Gill, and R. Welte, 2018 Antimicrobial peptides modulate  
837 long-term memory. *PLoS Genet.* 1–26.
- 838 Bergé, J. B., R. Feyereisen, and M. Amichot, 1998 Cytochrome P450 monooxygenases  
839 and insecticide resistance in insects. *Philos. Trans. R. Soc. B Biol. Sci.* 353: 1701–  
840 1705.

- 841 Bing, X. L., J. Gerlach, G. Loeb, and N. Buchon, 2018 Nutrient-dependent impact of  
842 microbes on *Drosophila suzukii* development. *MBio* 9: e02199-17.
- 843 Blum, J. E., C. N. Fischer, J. Miles, and J. Handelsman, 2013 Frequent Replenishment  
844 Sustains the Beneficial Microbiome of *Drosophila melanogaster*. *MBio* 4: 1–8.
- 845 Bost, A., S. Franzenburg, K. L. Adair, V. G. Martinson, G. Loeb *et al.*, 2017 How gut  
846 transcriptional function of *Drosophila melanogaster* varies with the presence and  
847 composition of the gut microbiota. *Mol. Ecol.* 27: 1–12.
- 848 Bost, A., V. G. Martinson, S. Franzenburg, K. L. Adair, A. Albasi *et al.*, 2018 Functional  
849 variation in the gut microbiome of wild *Drosophila* populations. *Mol. Ecol.* 27: 2834–  
850 2845.
- 851 Broderick, N. A., N. Buchon, and B. Lemaitre, 2014 Microbiota-Induced Changes in  
852 *Drosophila melanogaster* Host Gene Expression and Gut Morphology *MBio* 5: 1–  
853 13.
- 854 Broderick, N. A., and B. Lemaitre, 2012 Gut-associated microbes of *Drosophila*  
855 *melanogaster*. *Gut Microbes* 3: 307–321.
- 856 Brummel, T., A. Ching, L. Seroude, A. F. Simon, and S. Benzer, 2004 *Drosophila*  
857 lifespan enhancement by exogenous bacteria. *Proc. Natl. Acad. Sci.* 101: 12974–  
858 12979.
- 859 Buchon, N., N. a. Broderick, S. Chakrabarti, and B. Lemaitre, 2009 Invasive and  
860 indigenous microbiota impact intestinal stem cell activity through multiple pathways  
861 in *Drosophila*. *Genes Dev.* 23: 2333–2344.
- 862 Camacho, C., G. Coulouris, V. Avagyan, N. Ma, J. Papadopoulos *et al.*, 2009 BLAST+:  
863 Architecture and applications. *BMC Bioinformatics* 10: 1–9.

- 864 Cao, Y., S. Chtarbanova, A. J. Petersen, and B. Ganetzky, 2013 Dnr1 mutations cause  
865 neurodegeneration in *Drosophila* by activating the innate immune response in the  
866 brain. *Proc. Natl. Acad. Sci.* 110: E1752–E1760.
- 867 Chaston, J. M., A. J. Dobson, P. D. Newell, and A. E. Douglas, 2016 Host genetic  
868 control of the microbiota mediates the *Drosophila* nutritional phenotype. *Appl.*  
869 *Environ. Microbiol.* 82: 671–679.
- 870 Chaston, J., P. Newell, and A. Douglas, 2014 Metagenome-wide association of  
871 microbial determinants of host phenotype in *Drosophila melanogaster*. *MBio* 5: 1–  
872 12.
- 873 Chintapalli, V. R., J. Wang, and J. A. T. Dow, 2007 Using FlyAtlas to identify better  
874 *Drosophila melanogaster* models of human disease. *Nat. Genet.* 39: 715–720.
- 875 Chung, H., A. kyeong Kim, S. A. Jung, S. W. Kim, K. Yu *et al.*, 2010 The *Drosophila*  
876 homolog of methionine sulfoxide reductase A extends lifespan and increases  
877 nuclear localization of FOXO. *FEBS Lett.* 584: 3609–3614.
- 878 Clark, R. I., A. Salazar, R. Yamada, S. Fitz-Gibbon, M. Morselli *et al.*, 2015 Distinct  
879 Shifts in Microbiota Composition during *Drosophila* Aging Impair Intestinal Function  
880 and Drive Mortality. *Cell Rep.* 12: 1656–1667.
- 881 Cockburn, D. W., and N. M. Koropatkin, 2016 Polysaccharide Degradation by the  
882 Intestinal Microbiota and Its Influence on Human Health and Disease. *J. Mol. Biol.*  
883 428: 3230–3252.
- 884 Combe, B. E., A. Defaye, N. Bozonnet, D. Puthier, J. Royet *et al.*, 2014 *Drosophila*  
885 microbiota modulates host metabolic gene expression via IMD/NF-KB signaling.  
886 *PLoS One* 9: e94729.

- 887 Daïen, C. I., G. V. Pinget, J. K. Tan, and L. Macia, 2017 Detrimental impact of  
888 microbiota-accessible carbohydrate-deprived diet on gut and immune homeostasis:  
889 An overview. *Front. Immunol.* 8: 1-7.
- 890 Daisley, B. A., M. Trinder, T. W. McDowell, H. Welle, J. S. Dube *et al.*, 2017  
891 Neonicotinoid-induced pathogen susceptibility is mitigated by *Lactobacillus*  
892 *plantarum* immune stimulation in a *Drosophila melanogaster* model. *Sci. Rep.* 7:  
893 2703.
- 894 Dobson, A. J., J. M. Chaston, and A. E. Douglas, 2016 The *Drosophila* transcriptional  
895 network is structured by microbiota. *BMC Genomics* 17: 1–9.
- 896 Dobson, A. J., J. M. Chaston, P. D. Newell, L. Donahue, S. L. Hermann *et al.*, 2015  
897 Host genetic determinants of microbiota-dependent nutrition revealed by genome-  
898 wide analysis of *Drosophila melanogaster*. *Nat Commun* 6: 6312.
- 899 Douglas, A. E., 2018 The *Drosophila* model for microbiome research. *Lab Anim.* (NY).  
900 47: 157–164.
- 901 Durinck, S., P. T. Spellman, E. Birney, and W. Huber, 2009 Mapping identifiers for the  
902 integration of genomic datasets with the R/Bioconductor package biomaRt. *Nat.*  
903 *Protoc.* 4: 1184.
- 904 Early, A. M., N. Shanmugarajah, N. Buchon, and A. G. Clark, 2017 *Drosophila*  
905 Genotype Influences Commensal Bacterial Levels. *PLoS One* 12: e0170332.
- 906 Eden, P. a, T. M. Schmidt, R. P. Blakemore, and N. R. Pace, 1991 Phylogenetic  
907 analysis of *Aquaspirillum magnetotacticum* using polymerase chain reaction-  
908 amplified 16S rRNA-specific DNA. *Int. J. Syst. Bacteriol.* 41: 324–325.
- 909 Elgart, M., S. Stern, O. Salton, Y. Gnainsky, Y. Heifetz *et al.*, 2016 Impact of gut



- 910 microbiots on the fly's germ line. *Nat. Commun.* 7: 11280
- 911 Elya, C., V. Zhang, W. B. Ludington, and M. B. Eisen, 2016 Stable host gene  
912 expression in the gut of adult *Drosophila melanogaster* with different bacterial  
913 mono-associations. *PLoS One* 11: E0167357.
- 914 Erkosar, B., S. Kolly, J. R. van der Meer, and T. J. Kawecki, 2017 Adaptation to  
915 Chronic Nutritional Stress Leads to Reduced Dependence on Microbiota in  
916 *Drosophila melanogaster*. *MBio* 8: 1–18.
- 917 Ewald, C., 2018 Redox Signaling of NADPH Oxidases Regulates Oxidative Stress  
918 Responses, Immunity and Aging. *Antioxidants* 7: 130.
- 919 Farine, J.-P., W. Habbachi, J. Cortot, S. Roche, and J.-F. Ferveur, 2017 Maternally-  
920 transmitted microbiota affects odor emission and preference in *Drosophila* larva.  
921 *Sci. Rep.* 7: 6062.
- 922 Fast, D., A. Duggal, and E. Foley, 2018 Monoassociation with *Lactobacillus plantarum*  
923 Disrupts Intestinal Homeostasis in Adult *Drosophila melanogaster*. *MBio* 9: e01114-  
924 18.
- 925 Ferrandon, D., J. L. Imler, C. Hetru, and J. A. Hoffmann, 2007 The *Drosophila* systemic  
926 immune response: Sensing and signalling during bacterial and fungal infections.  
927 *Nat. Rev. Immunol.* 7: 862–874.
- 928 Fischer, C., E. P. Trautman, J. M. Crawford, E. V Stabb, J. Handelsman *et al.*, 2017  
929 Metabolite exchange between microbiome members produces compounds that  
930 influence *Drosophila* behavior. *Elife* 6: 1–25.
- 931 Géminard, C., E. J. Rulifson, and P. Léopold, 2009 Remote Control of Insulin Secretion  
932 by Fat Cells in *Drosophila*. *Cell Metab.* 10: 199–207.

- 933 Guo, L., J. Karpac, S. L. Tran, and H. Jasper, 2014 PGRP-SC2 promotes gut immune  
934 homeostasis to limit commensal dysbiosis and extend lifespan. *Cell* 156: 109–122.
- 935 Hang, S., A. E. Purdy, W. P. Robins, Z. Wang, M. Mandal *et al.*, 2014 The acetate  
936 switch of an intestinal pathogen disrupts host insulin signaling and lipid metabolism.  
937 *Cell Host Microbe* 16: 592–604.
- 938 Hsiao, E. Y., S. W. McBride, S. Hsien, G. Sharon, E. R. Hyde *et al.*, 2013 Microbiota  
939 Modulate Behavioral and Physiological Abnormalities Associated with  
940 Neurodevelopmental Disorders. *Cell* 155: 1451–1.
- 941 Huang, J.-H., and A. E. Douglas, 2015 Consumption of dietary sugar by gut bacteria  
942 determines *Drosophila* lipid content. *Biol. Lett.* 11: 20150469.
- 943 Iatsenko, I., J. P. Boquete, and B. Lemaitre, 2018 Microbiota-Derived Lactate Activates  
944 Production of Reactive Oxygen Species by the Intestinal NADPH Oxidase Nox and  
945 Shortens *Drosophila* Lifespan. *Immunity* 49: 929–942.e5.
- 946 Jacqueline, C., L. Brazier, D. Faugère, F. Renaud, F. Thomas *et al.*, 2017 Can intestinal  
947 microbiota be associated with non-intestinal cancers? *Sci. Rep.* 7: 12722.
- 948 Johnson, T. E., G. J. Lithgow, and S. Murakami, 1996 Interventions that increase the  
949 response to stress offer the potential for effective life prolongation and increased  
950 health. *Journals Gerontol. - Ser. A Biol. Sci. Med. Sci.* 51: B392-B395.
- 951 Jones, R. M. M., C. Desai, T. M. M. Darby, L. Luo, A. A. A. Wolfarth *et al.*, 2015  
952 Lactobacilli Modulate Epithelial Cytoprotection through the Nrf2 Pathway. *Cell Rep.*  
953 12: 1217–1225.
- 954 Jones, R. M., L. Luo, C. S. Ardita, A. N. Richardson, Y. M. Kwon *et al.*, 2013 Symbiotic  
955 lactobacilli stimulate gut epithelial proliferation via Nox-mediated generation of

- 956 reactive oxygen species. *EMBO J.* 32: 3017–28.
- 957 Judd, A. M., M. K. Matthews, R. Hughes, M. Veloz, C. E. Sexton *et al.*, 2018 Bacterial  
958 methionine metabolism genes influence *Drosophila melanogaster* starvation  
959 resistance 1 2. 1–35.
- 960 Kamareddine, L., W. P. Robins, C. D. Berkey, J. J. Mekalanos, and P. I. Watnick, 2018  
961 The *Drosophila* Immune Deficiency Pathway Modulates Enteroendocrine Function  
962 and Host Metabolism. *Cell Metab.* 28: 449-462.
- 963 Kang, J., J. Kim, and K. W. Choi, 2011 Novel cytochrome P450, *cyp6a17*, is required for  
964 temperature preference behavior in *Drosophila*. *PLoS One* 6: E29800.
- 965 Kim, G., J. H. Huang, J. G. McMullen, P. D. Newell, and A. E. Douglas, 2017  
966 Physiological responses of insects to microbial fermentation products: insights from  
967 the interactions between *Drosophila* and acetic acid. *J. Insect Physiol.* 106: 13-19.
- 968 Kohl, K. D., and H. V. Carey, 2016 A place for host–microbe symbiosis in the  
969 comparative physiologist’s toolbox. *J. Exp. Biol.* 219: 3496–3504.
- 970 Kounatidis, I., S. Chtarbanova, Y. Cao, M. Hayne, D. Jayanth *et al.*, 2017 NF- $\kappa$ B  
971 Immunity in the Brain Determines Fly Lifespan in Healthy Aging and Age-Related  
972 Neurodegeneration. *Cell Rep.* 19: 836–848.
- 973 Koyle, M. L., M. Veloz, A. M. Judd, A. C.-N. Wong, P. D. Newell *et al.*, 2016 Rearing the  
974 Fruit Fly *Drosophila melanogaster* Under Axenic and Gnotobiotic Conditions. *J. Vis.*  
975 *Exp.* 1–8.
- 976 Lee, K. A., S. H. Kim, E. K. Kim, E. M. Ha, H. You *et al.*, 2013 Bacterial-derived uracil as  
977 a modulator of mucosal immunity and gut-microbe homeostasis in *drosophila*. *Cell*  
978 153: 797–811.

- 979 Leitão-Gonçalves, R., Z. Carvalho-Santos, A. P. Francisco, G. T. Fioreze, M. Anjos *et*  
980 *al.*, 2017 Commensal bacteria and essential amino acids control food choice  
981 behavior and reproduction. *PLOS Biol.* 15: e2000862.
- 982 Li, H., Y. Qi, and H. Jasper, 2016 Preventing Age-Related Decline of Gut  
983 Compartmentalization Limits Microbiota Dysbiosis and Extends Lifespan. *Cell Host*  
984 *Microbe* 19: 240–253.
- 985 Lin, M. T., and M. F. Beal, 2003 The oxidative damage theory of aging, *Clin. Neurosci.*  
986 *Res.* 2: 305-315.
- 987 Lindberg, B. G., X. Tang, W. Dantoft, P. Gohel, S. Seyedoleslami Esfahani *et al.*, 2018  
988 Nubbin isoform antagonism governs *Drosophila* intestinal immune homeostasis.  
989 *PLoS Pathog.* 14: E1006936.
- 990 Liu, W., K. Zhang, Y. Li, W. Su, K. Hu *et al.*, 2017 Enterococci Mediate the Oviposition  
991 Preference of *Drosophila melanogaster* through Sucrose Catabolism. *Sci. Rep.* 7:  
992 1–14.
- 993 Love, M. I., W. Huber, and S. Anders, 2014 Moderated estimation of fold change and  
994 dispersion for RNA-seq data with DESeq2. *Genome Biol.* 15: 550.
- 995 Lyne, R., R. Smith, K. Rutherford, M. Wakeling, A. Varley *et al.*, 2007 FlyMine: an  
996 integrated database for *Drosophila* and *Anopheles* genomics. *Genome Biol.* 8:  
997 R129.
- 998 Martino, M., D. Ma, and F. Leulier, 2017 Microbial influence on *Drosophila* biology. *Curr.*  
999 *Opin. Microbiol.* 38: 165–170.
- 1000 Matos, R. C., M. Schwarzer, H. Gervais, P. Courtin, P. Joncour *et al.*, 2017 D-  
1001 Alanylation of teichoic acids contributes to *Lactobacillus plantarum*-mediated

- 1002           Drosophila growth during chronic undernutrition. *Nat. Microbiol.* 2: 1635-1647.
- 1003   Mattaliano, M. D., E. S. Montana, K. M. Parisky, J. T. Littleton, and L. C. Griffith, 2007
- 1004           The Drosophila ARC homolog regulates behavioral responses to starvation. *Mol.*
- 1005           *Cell. Neurosci.* 36: 211–221.
- 1006   McFall-Ngai, M., M. G. Hadfield, T. C. G. Bosch, H. V Carey, T. Domazet-Lošo *et al.*,
- 1007           2013 Animals in a bacterial world, a new imperative for the life sciences. *Proc. Natl.*
- 1008           *Acad. Sci.* 110: 3229–3236.
- 1009   Morgulis, A., G. Coulouris, Y. Raytselis, T. L. Madden, R. Agarwala *et al.*, 2008
- 1010           Database indexing for production MegaBLAST searches. *Bioinformatics* 24: 1757-
- 1011           1764.
- 1012   Morrow, G., M. Samson, S. Michaud, and R. M. Tanguay, 2004 Overexpression of the
- 1013           small mitochondrial Hsp22 extends Drosophila life span and increases resistance
- 1014           to oxidative stress. *FASEB J.* 18: 598–599.
- 1015   Mosher, J., W. Zhang, R. Z. Blumhagen, A. D’Alessandro, T. Nemkov *et al.*, 2015
- 1016           Coordination between Drosophila Arc1 and a specific population of brain neurons
- 1017           regulates organismal fat. *Dev. Biol.* 405: 280–290.
- 1018   Nässel, D. R., and J. Vanden Broeck, 2016 Insulin/IGF signaling in Drosophila and
- 1019           other insects: Factors that regulate production, release and post-release action of
- 1020           the insulin-like peptides. *Cell. Mol. Life Sci.* 73: 271–290.
- 1021   Naudin, C. R., R. M. Jones, B. J. Saeedi, L. Luo, T. M. Darby *et al.*, 2019 *Lactococcus*
- 1022           *lactis* subsp. *cremoris* is an efficacious beneficial bacterium that limits tissue injury
- 1023           in the intestine. *iScience* 12: 356–367.
- 1024   Newell, P. D., J. M. Chaston, Y. Wang, N. J. Winans, D. R. Sannino *et al.*, 2014 In vivo

1025 function and comparative genomic analyses of the drosophila gut microbiota  
1026 identify candidate symbiosis factors. *Front. Microbiol.* 5: 576.

1027 Newell, P. D., and A. E. Douglas, 2014 Interspecies Interactions Determine the Impact  
1028 of the Gut Microbiota on Nutrient Allocation in *Drosophila melanogaster*. *Appl.*  
1029 *Environ. Microbiol.* 80: 788–796.

1030 O'Connor, R. M., E. F. Stone, C. R. Wayne, E. V. Marcinkevicius, M. Ulgherait *et al.*,  
1031 2017 A *Drosophila* model of Fragile X syndrome exhibits defects in phagocytosis by  
1032 innate immune cells. *J. Cell Biol.* 216: 595–605.

1033 Obadia, B., Z. T. Güvener, V. Zhang, J. A. Ceja-Navarro, E. L. Brodie *et al.*, 2017  
1034 Probabilistic Invasion Underlies Natural Gut Microbiome Stability. *Curr. Biol.* 27:  
1035 1999-2006.

1036 Obata, F., C. O. Fons, and A. P. Gould, 2018 Early-life exposure to low-dose oxidants  
1037 can increase longevity via microbiome remodelling in *Drosophila*. *Nat. Commun.* 9:  
1038 975.

1039 Park, S., J. M. Park, S. Kim, J. A. Kim, J. D. Shepherd *et al.*, 2008 Elongation Factor 2  
1040 and Fragile X Mental Retardation Protein Control the Dynamic Translation of  
1041 *Arc/Arg3.1* Essential for mGluR-LTD. *Neuron* 59: 70–83.

1042 Pastuzyn, E. D., C. E. Day, R. B. Kearns, M. Kyrke-Smith, A. V. Taibi *et al.*, 2018 The  
1043 Neuronal Gene *Arc* Encodes a Repurposed Retrotransposon Gag Protein that  
1044 Mediates Intercellular RNA Transfer. *Cell* 173: 275.

1045 Patro, R., G. Duggal, M. I. Love, R. A. Irizarry, and C. Kingsford, 2017 Salmon provides  
1046 fast and bias-aware quantification of transcript expression. *Nat. Methods* 14: 417-  
1047 419.

- 1048 Petersen, A. J., R. J. Katzenberger, and D. A. Wassarman, 2013 The innate immune  
1049 response transcription factor relish is necessary for neurodegeneration in a  
1050 *Drosophila* model of ataxia-telangiectasia. *Genetics* 194: 133–142.
- 1051 Petkau, K., M. Ferguson, S. Guntermann, and E. Foley, 2017 Constitutive Immune  
1052 Activity Promotes Tumorigenesis in *Drosophila* Intestinal Progenitor Cells. *Cell*  
1053 *Rep.* 20: 1784–1793.
- 1054 Petkau, K., B. D. Parsons, A. Duggal, and E. Foley, 2014 A deregulated intestinal cell  
1055 cycle program disrupts tissue homeostasis without affecting longevity in *drosophila*.  
1056 *J. Biol. Chem.* 289: 28719–28729.
- 1057 Pruesse, E., J. Peplies, and F. O. Glöckner, 2012 SINA: Accurate high-throughput  
1058 multiple sequence alignment of ribosomal RNA genes. *Bioinformatics* 28: 1823–  
1059 1829.
- 1060 Ramakers, C., J. M. Ruijter, R. H. Lekan Deprez, and A. F. M. Moorman, 2003  
1061 Assumption-free analysis of quantitative real-time polymerase chain reaction (PCR)  
1062 data. *Neurosci. Lett.* 339: 62–66.
- 1063 Ridley, E. V., A. C. N. Wong, S. Westmiller, and A. E. Douglas, 2012 Impact of the  
1064 resident microbiota on the nutritional phenotype of *drosophila melanogaster*. *PLoS*  
1065 *One* 7: E36765.
- 1066 Roesijadi, G., S. Rezvankhah, D. M. Binniger, and H. Weissbach, 2007 Ecdysone  
1067 induction of MsrA protects against oxidative stress in *Drosophila*. *Biochem.*  
1068 *Biophys. Res. Commun.* 354: 511–516.
- 1069 Rosser, E. C., and C. Mauri, 2016 A clinical update on the significance of the gut  
1070 microbiota in systemic autoimmunity. *J. Autoimmun.* 74: 85–93.

- 1071 Rudinskiy, N., J. M. Hawkes, R. A. Betensky, M. Eguchi, S. Yamaguchi *et al.*, 2012  
1072 Orchestrated experience-driven Arc responses are disrupted in a mouse model of  
1073 Alzheimer's disease. *Nat. Neurosci.* 15: 1422–1429.
- 1074 Ryu, J.-H., S.-H. Kim, H.-Y. Lee, J. Y. Bai, Y.-D. Nam *et al.*, 2008 Innate Immune  
1075 Homeostasis by the Homeobox Gene Caudal and Commensal-Gut Mutualism in  
1076 *Drosophila*. *Science* 319: 777–782.
- 1077 Sampson, T. R., and S. K. Mazmanian, 2015 Control of brain development, function,  
1078 and behavior by the microbiome. *Cell Host Microbe* 17: 565–576.
- 1079 Sannino, D. R., A. J. Dobson, K. Edwards, E. R. Angert, and N. Buchon, 2018 The  
1080 *Drosophila melanogaster* Gut Microbiota Provisions Thiamine to Its Host. *MBio* 9:  
1081 e00155-18.
- 1082 Sansone, C. L., J. Cohen, A. Yasunaga, J. Xu, G. Osborn *et al.*, 2015 Microbiota-  
1083 Dependent Priming of Antiviral Intestinal Immunity in *Drosophila*. *Cell Host Microbe*  
1084 18: 571–81.
- 1085 Schretter, C. E., J. Vielmetter, I. Bartos, Z. Marka, S. Marka *et al.*, 2018 A gut microbial  
1086 factor modulates locomotor behaviour in *Drosophila*. *Nature* 563: 402-406.
- 1087 Sharon, G., T. R. Sampson, D. H. Geschwind, and S. K. Mazmanian, 2016 The Central  
1088 Nervous System and the Gut Microbiome. *Cell* 167: 915–932.
- 1089 Shepherd, J. D., and M. F. Bear, 2011 New views of Arc, a master regulator of synaptic  
1090 plasticity. *Nat. Neurosci.* 14: 279–284.
- 1091 Shin, S. C., S. H. Kim, H. You, B. Kim, A. C. Kim *et al.*, 2011 *Drosophila* microbiome  
1092 modulates host developmental and metabolic homeostasis via insulin signaling.  
1093 *Science* 334: 670–674.



- 1094 Smith, K., K. D. McCoy, and A. J. Macpherson, 2007 Use of axenic animals in studying  
1095 the adaptation of mammals to their commensal intestinal microbiota. *Semin.*  
1096 *Immunol.* 19: 59–69.
- 1097 Storelli, G., A. Defaye, B. Erkosar, P. Hols, J. Royet *et al.*, 2011 *Lactobacillus plantarum*  
1098 promotes drosophila systemic growth by modulating hormonal signals through  
1099 TOR-dependent nutrient sensing. *Cell Metab.* 14: 403–414.
- 1100 Storelli, G., M. Strigini, T. Grenier, L. Bozonnet, M. Schwarzer *et al.*, 2017 *Drosophila*  
1101 Perpetuates Nutritional Mutualism by Promoting the Fitness of Its Intestinal  
1102 Symbiont *Lactobacillus plantarum*. *Cell Metab.* 1–16.
- 1103 Téfit, M. A., and F. Leulier, 2017 *Lactobacillus plantarum* favors the early emergence of  
1104 fit and fertile adult *Drosophila* upon chronic undernutrition. *J. Exp. Biol.* 220: 900-  
1105 907.
- 1106 Tzingounis, A. V., and R. A. Nicoll, 2006 Arc/Arg3.1: Linking Gene Expression to  
1107 Synaptic Plasticity and Memory. *Neuron* 52: 403–407.
- 1108 Wang, L., J. Karpac, and H. Jasper, 2013 Promoting longevity by maintaining metabolic  
1109 and proliferative homeostasis. *J. Exp. Biol.* 217: 109–118.
- 1110 Wong, A. C., J. M. Chaston, and A. E. Douglas, 2013 The inconstant gut microbiota of  
1111 *Drosophila* species revealed by 16S rRNA gene analysis. *ISME J* 7: 1922–1932.
- 1112 Wong, A. C., A. J. Dobson, and A. E. Douglas, 2014 Gut microbiota dictates the  
1113 metabolic response of *Drosophila* to diet. *J Exp Biol* 217: 1894–1901.
- 1114 Wong, A. C. N., Y. Luo, X. Jing, S. Franzenburg, A. Bost *et al.*, 2015 The host as the  
1115 driver of the microbiota in the gut and external environment of *Drosophila*  
1116 *melanogaster*. *Appl. Environ. Microbiol.* 81: 6232–6240.

- 1117 Wong, C. N. A., P. Ng, and A. E. Douglas, 2011 Low-diversity bacterial community in  
1118 the gut of the fruitfly *Drosophila melanogaster*. *Environ. Microbiol.* 13: 1889–1900.
- 1119 Wong, A. C.-N., Q.-P. Wang, J. Morimoto, A. M. Senior, M. Lihoreau *et al.*, 2017 Gut  
1120 Microbiota Modifies Olfactory-Guided Microbial Preferences and Foraging  
1121 Decisions in *Drosophila*. *Curr. Biol.* 13: 163–167.
- 1122 Wu, S.-C., Z.-S. Cao, K.-M. Chang, and J.-L. Juang, 2017 Intestinal microbial dysbiosis  
1123 aggravates the progression of Alzheimer's disease in *Drosophila*. *Nat. Commun.* 8:  
1124 24.
- 1125 Yu, S., Y. Jang, D. Paik, E. Lee, and J. J. Park, 2015 Nmdmc overexpression extends  
1126 *Drosophila* lifespan and reduces levels of mitochondrial reactive oxygen species.  
1127 *Biochem. Biophys. Res. Commun.* 465: 845–850.
- 1128
- 1129
- 1130
- 1131
- 1132
- 1133
- 1134
- 1135
- 1136
- 1137
- 1138
- 1139

## 1140 FIGURE LEGENDS

### 1141 **Figure 1**

1142 Overview of the head transcriptomic response microbiota elimination in adult male Top  
1143 Banana *Drosophila*. (A) Volcano plot representation of RNA-seq results plotting all genes  
1144 with non-zero read counts according to statistical significance (Benjamini-Hochberg  
1145 adjusted p-value) as a function of fold change in GF vs. CV male heads. Genes with  $\log_2$   
1146 fold change  $>0.5$  and FDR-adjusted p-value  $<0.05$  are highlighted. (B) Heatmap  
1147 representation of 343 candidate genes identified as statistically significant ( $p\text{-adj}<0.1$ ) in  
1148 at least one leave-out analysis conducted on the entire RNA-seq dataset (File S4). Each  
1149 column represents a biological replicate of the indicated condition (RNA from 50 individual  
1150 heads/replicate); colors represent row Z-scores derived from transcripts per million (TPM)  
1151 values for each gene. (C) GO-terms enriched (Holm-Bonferroni adjusted p-value $<0.001$ ,  
1152  $\geq 20$  genes) in the 248/343 candidate genes downregulated ( $\log_2\text{fc}<0$ ) in the heads of male  
1153 GF compared to CV flies. (D) GO-terms enriched (Holm-Bonferroni adjusted p-  
1154 value $<0.05$ ) in the 95/343 candidate genes upregulated ( $\log_2\text{fc}>0$ ) in the heads of male GF  
1155 compared to CV flies.

1156

### 1157 **Figure 2**

1158 Microbiota-dependent gene expression changes in adult male (A) and female (B) Top  
1159 Banana *Drosophila* heads revealed by secondary screening with the nanoString nCounter  
1160 platform. Blue bars represent  $\log_2$  fold change values comparing GF and CV heads; gray  
1161 bars represent  $\log_2$  fold change values comparing GF heads to GNO flies reared in  
1162 polyassociation with a four-species microbial community consisting of *Acetobacter* and  
1163 *Lactobacillus* bacteria isolated from CV Top Banana cultures. Data are independently  
1164 ordered for each sex based on  $\log_2$  fold change values for the GF vs. GNO comparison,  
1165 with GF vs. CV value adjacent for each gene. Fold change values are calculated based  
1166 on means of normalized mRNA counts for each condition ( $n=5$  replicates each for CV  
1167 males, GF females, GNO females, and  $n=6$  replicates each for CV females, GF males,  
1168 GNO males; 5-10 heads/replicate). The values plotted here are also found in File S6  
1169 “Log2FoldChange”.

1170

### 1171 **Figure 3**

1172 The microbiota induce innate immune gene expression in the heads of adult flies.  
1173 nanoString data are represented as individual gene plots for each immunity-related gene  
1174 for which microbial condition yielded a statistically significant expression difference in at  
1175 least one sex.  $n=5$  replicates each for CV males, GF females, GNO females, and  $n=6$   
1176 replicates each for CV females, GF males, GNO males; 5-10 heads/replicate. Data were  
1177 analyzed independently for each sex via one-way ANOVA with Tukey HSD *post-hoc* tests  
1178 or Kruskal-Wallis test with Dunn’s multiple comparisons test when assumptions of equal  
1179 variance and normal distribution were broken.  $p<0.05$  \*,  $p<0.01$  \*\*, ns=not significant.

1180

### 1181 **Figure 4**

1182 Sex-specific microbial modulation of expression of genes involved in detoxification,  
1183 oxidative stress resistance, and predicted metabolic function in the heads of adult Top  
1184 Banana *Drosophila*. nanoString data are represented as plots of individual genes for

1185 which microbial condition yielded a statistically significant expression difference in at least  
1186 one sex. n=5 replicates each for CV males, GF females, GNO females, and n=6 replicates  
1187 each for CV females, GF males, GNO males; 5-10 heads/replicate. Data were analyzed  
1188 independently for each sex via one-way ANOVA with Tukey HSD *post-hoc* tests or  
1189 Kruskal-Wallis test with Dunn's multiple comparisons test when assumptions of equal  
1190 variance and normal distribution were broken. p<0.05 \*, p<0.01 \*\*, ns=not significant.

1191  
1192 **Figure 5**  
1193 Microbial suppression of *Arc1* expression in adult male Top Banana *Drosophila* heads  
1194 can be mediated by interaction with specific, individual bacteria. (A) nanoString data  
1195 demonstrating elevation of *Arc1* mRNA in the heads of male and, more moderately,  
1196 female flies. n=5 replicates each for CV males, GF females, GNO females, and n=6  
1197 replicates each for CV females, GF males, GNO males; 5-10 heads/replicate. (B)  
1198 Monoassociation with only three members of the four-species GNO bacterial community–  
1199 *Acetobacter sp.*, *L. brevis*, and *A. pasteurianus*, but not *L. plantarum*–is sufficient to  
1200 reduce *Arc1* expression in the heads of male Top Banana flies, as measured by RT-  
1201 qPCR. n=4 biological replicates of each condition, 10 heads/replicate. Figure represents  
1202 fold change relative to GF flies following normalization to the average of housekeeping  
1203 genes *Rpl32* and *14-3-3ε* as calculated via  $\Delta\Delta C_t$  values. Error bars represent standard  
1204 error of the mean. Data from both experiments were analyzed via one-way ANOVA with  
1205 Tukey HSD *post-hoc* tests. p<0.05 \*, p<0.01 \*\*, p<0.0005 \*\*\*, ns=not significant.

1206  
1207 **Figure 6**  
1208 Candidate microbiota-dependent gene expression effects identified in Top Banana  
1209 *Drosophila* are impacted by host genotype. (A) Male, but not (B) female,  $w^{1118}$  flies  
1210 exhibit microbiota-induced reduction of *Arc1* expression in the head. (C) & (D) *Hsp22*  
1211 expression in male and female  $w^{1118}$  heads is unaffected by microbial condition, unlike  
1212 the female-specific elevation observed in GF Top Banana flies via nanoString. (E) & (F)  
1213 *DptA* expression is elevated in the heads of GNO  $w^{1118}$  females compared to GF  
1214 females; a similar trend that does not achieve statistical significance is observed in male  
1215 heads and CV female heads. n=3 biological replicates of each condition, 10  
1216 heads/replicate. Figure represents fold change relative to GF flies following  
1217 normalization to *Rpl32*  $\Delta\Delta C_t$  values. Error bars represent standard error of the mean.  
1218 Data were analyzed via one-way ANOVA with Tukey HSD *post-hoc* tests. p<0.0005 \*\*\*,  
1219 ns=not significant.

**FIGURE 1**

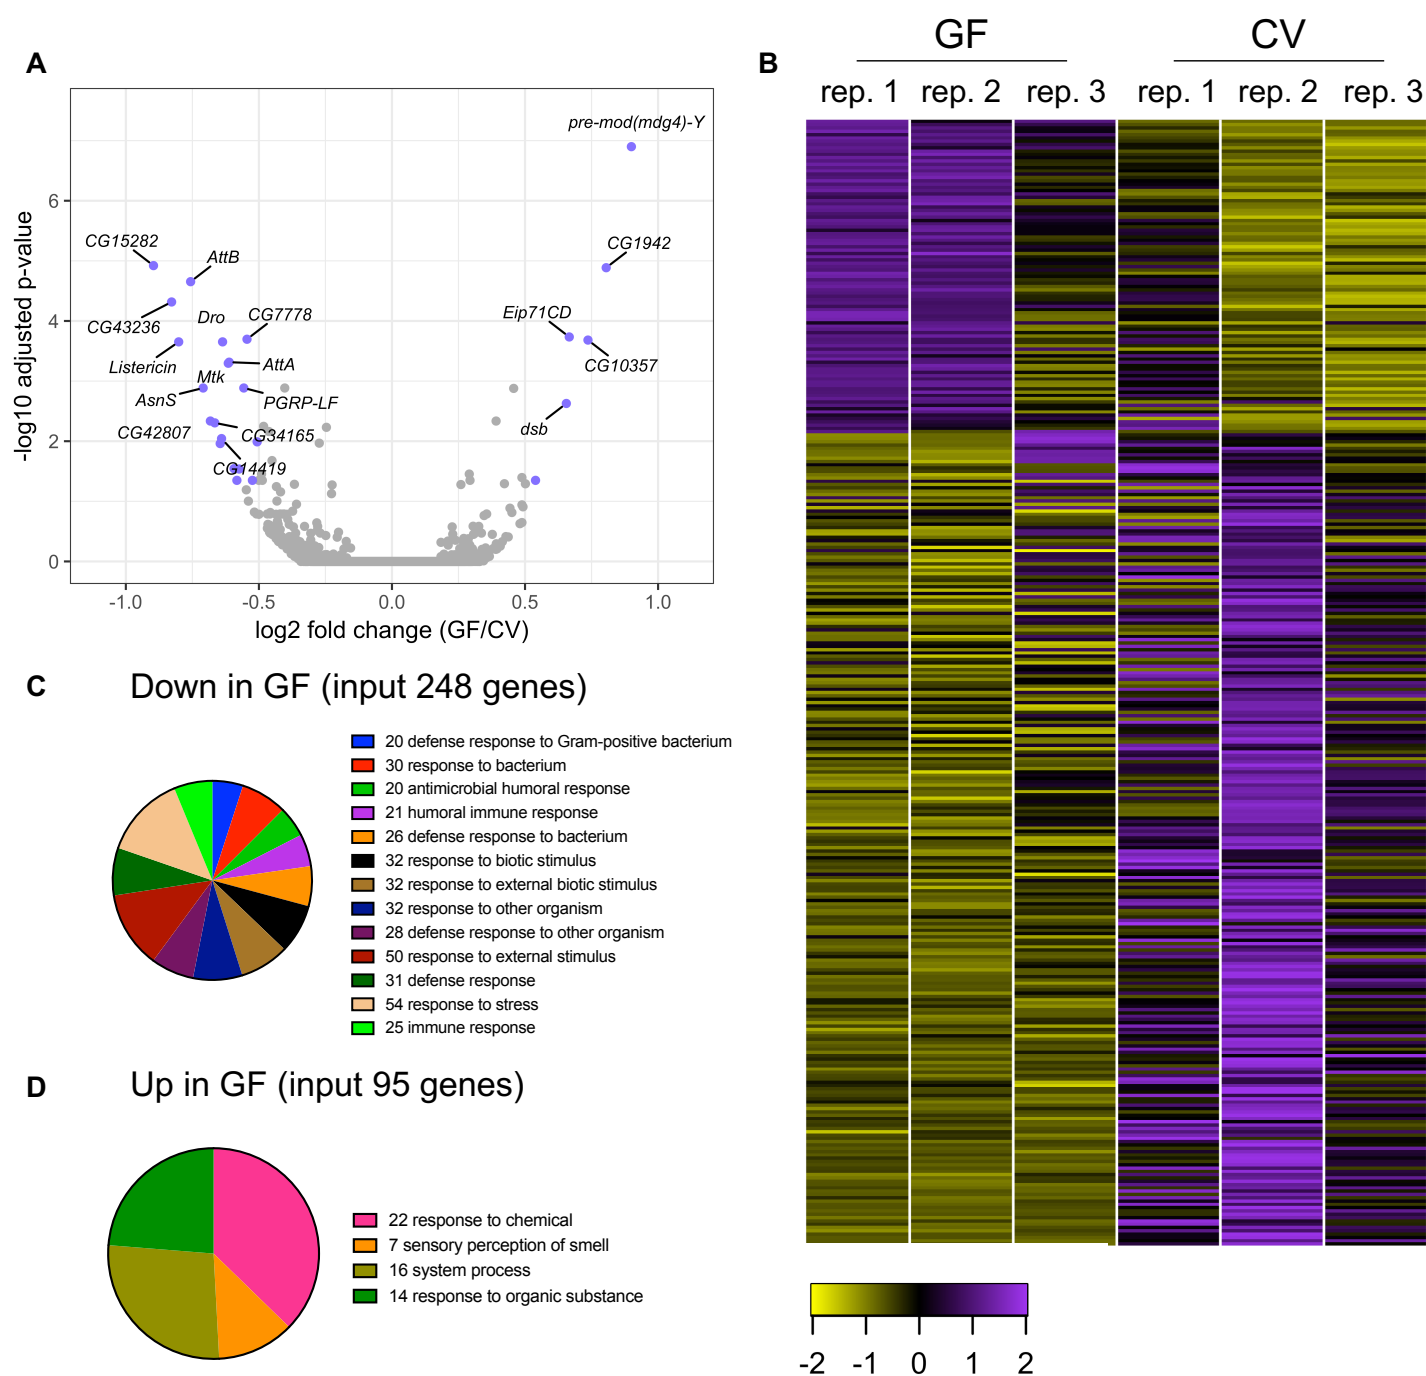

**FIGURE 2**

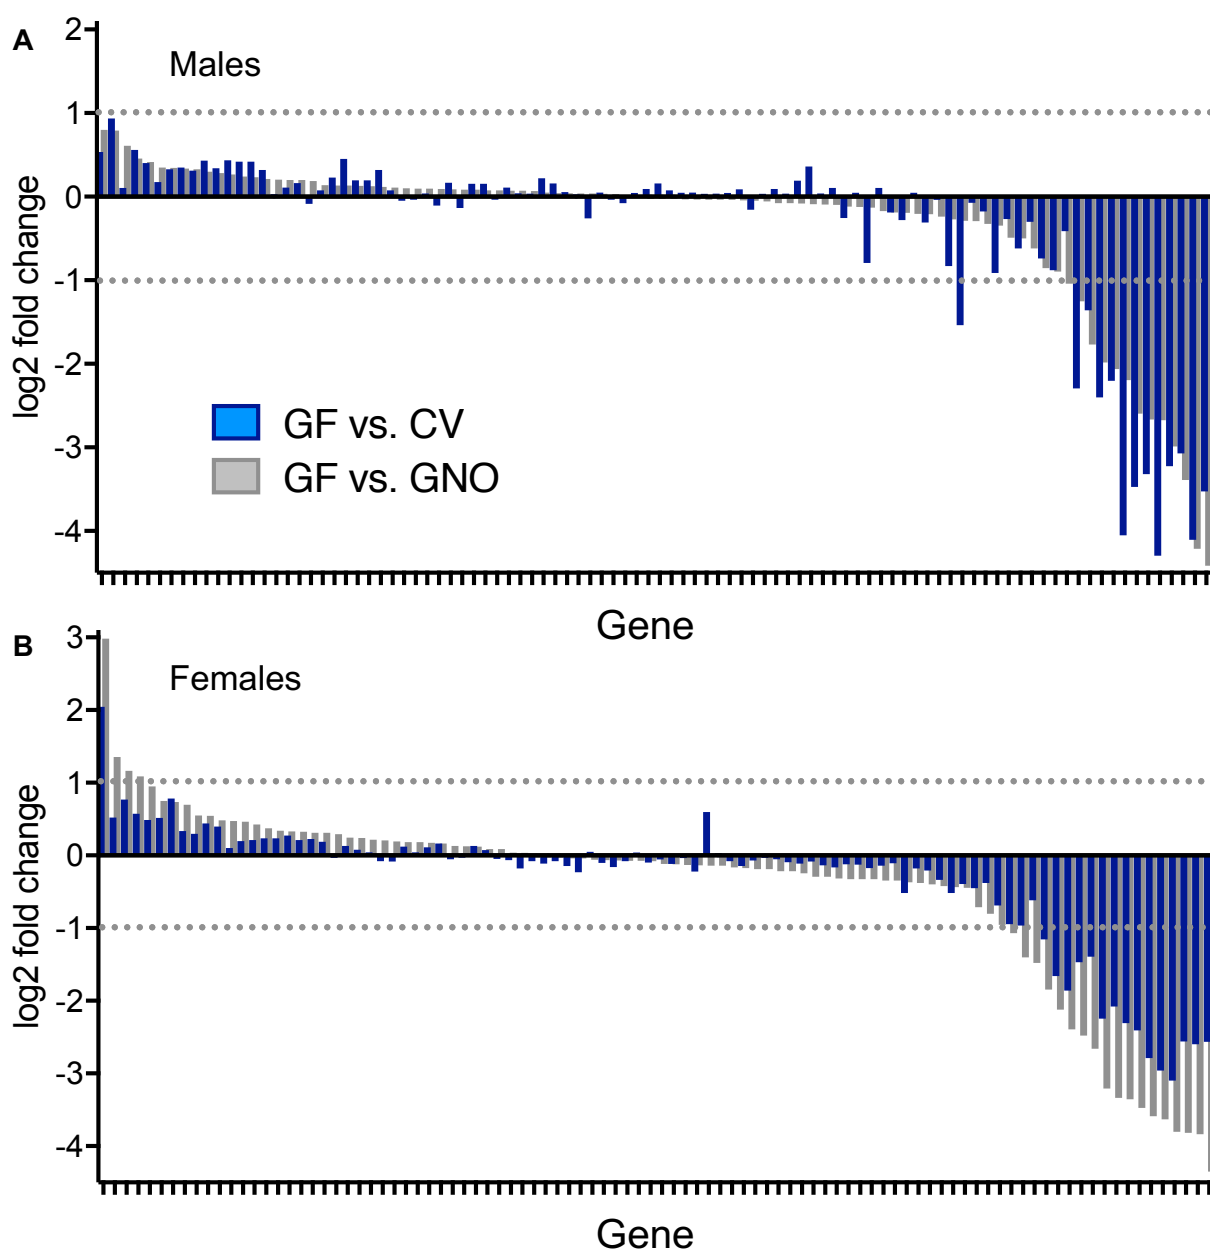

FIGURE 3

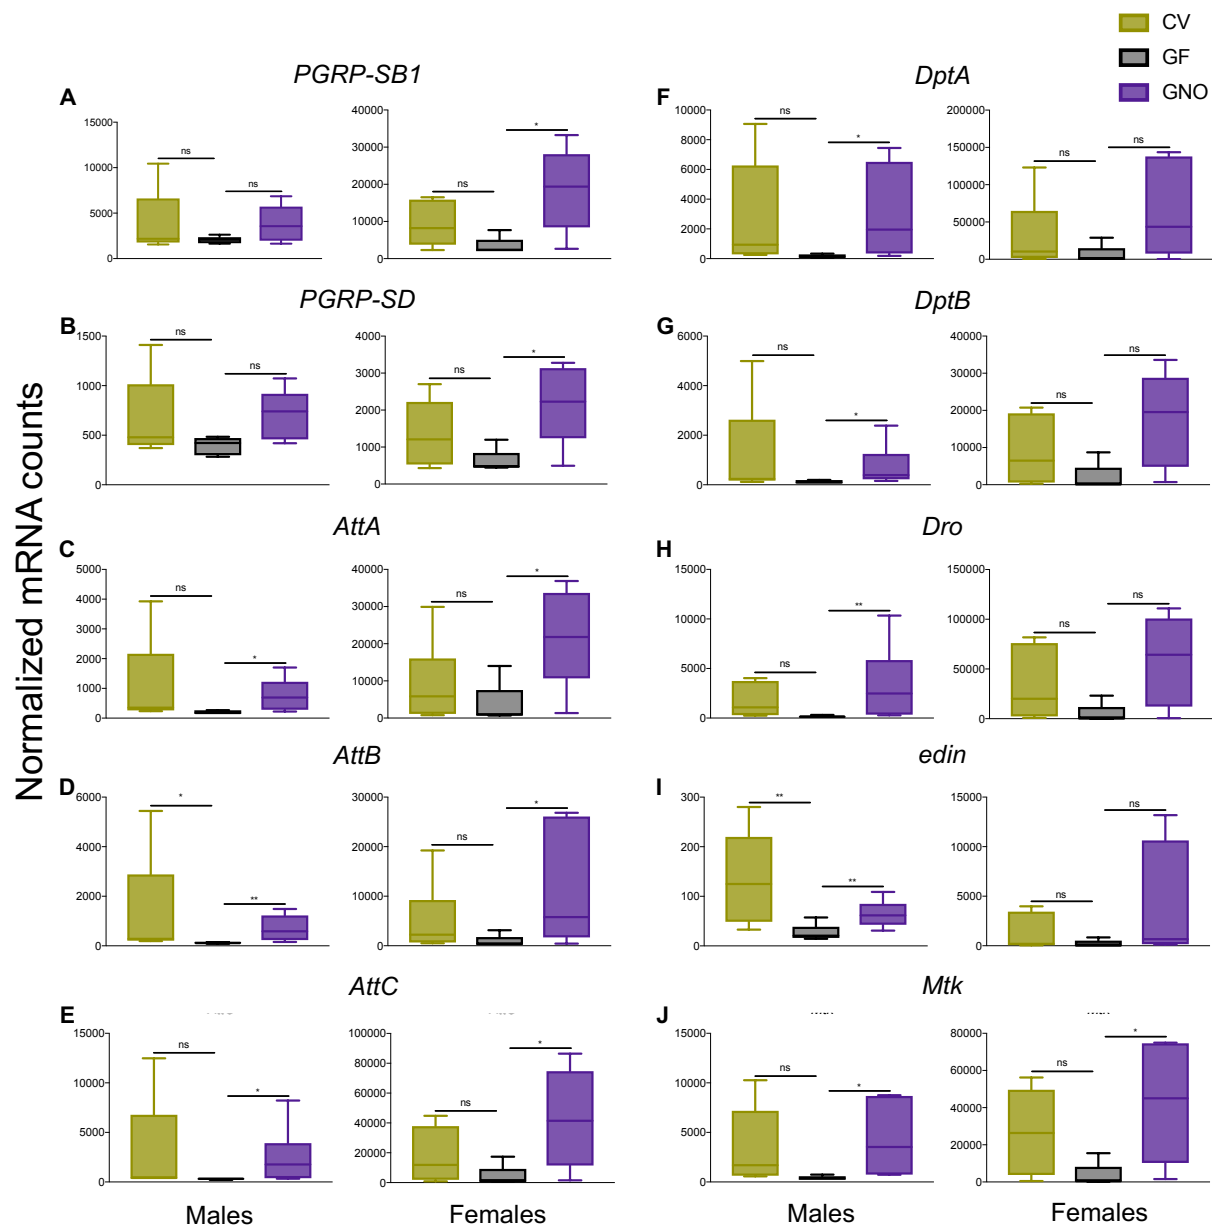

FIGURE 4

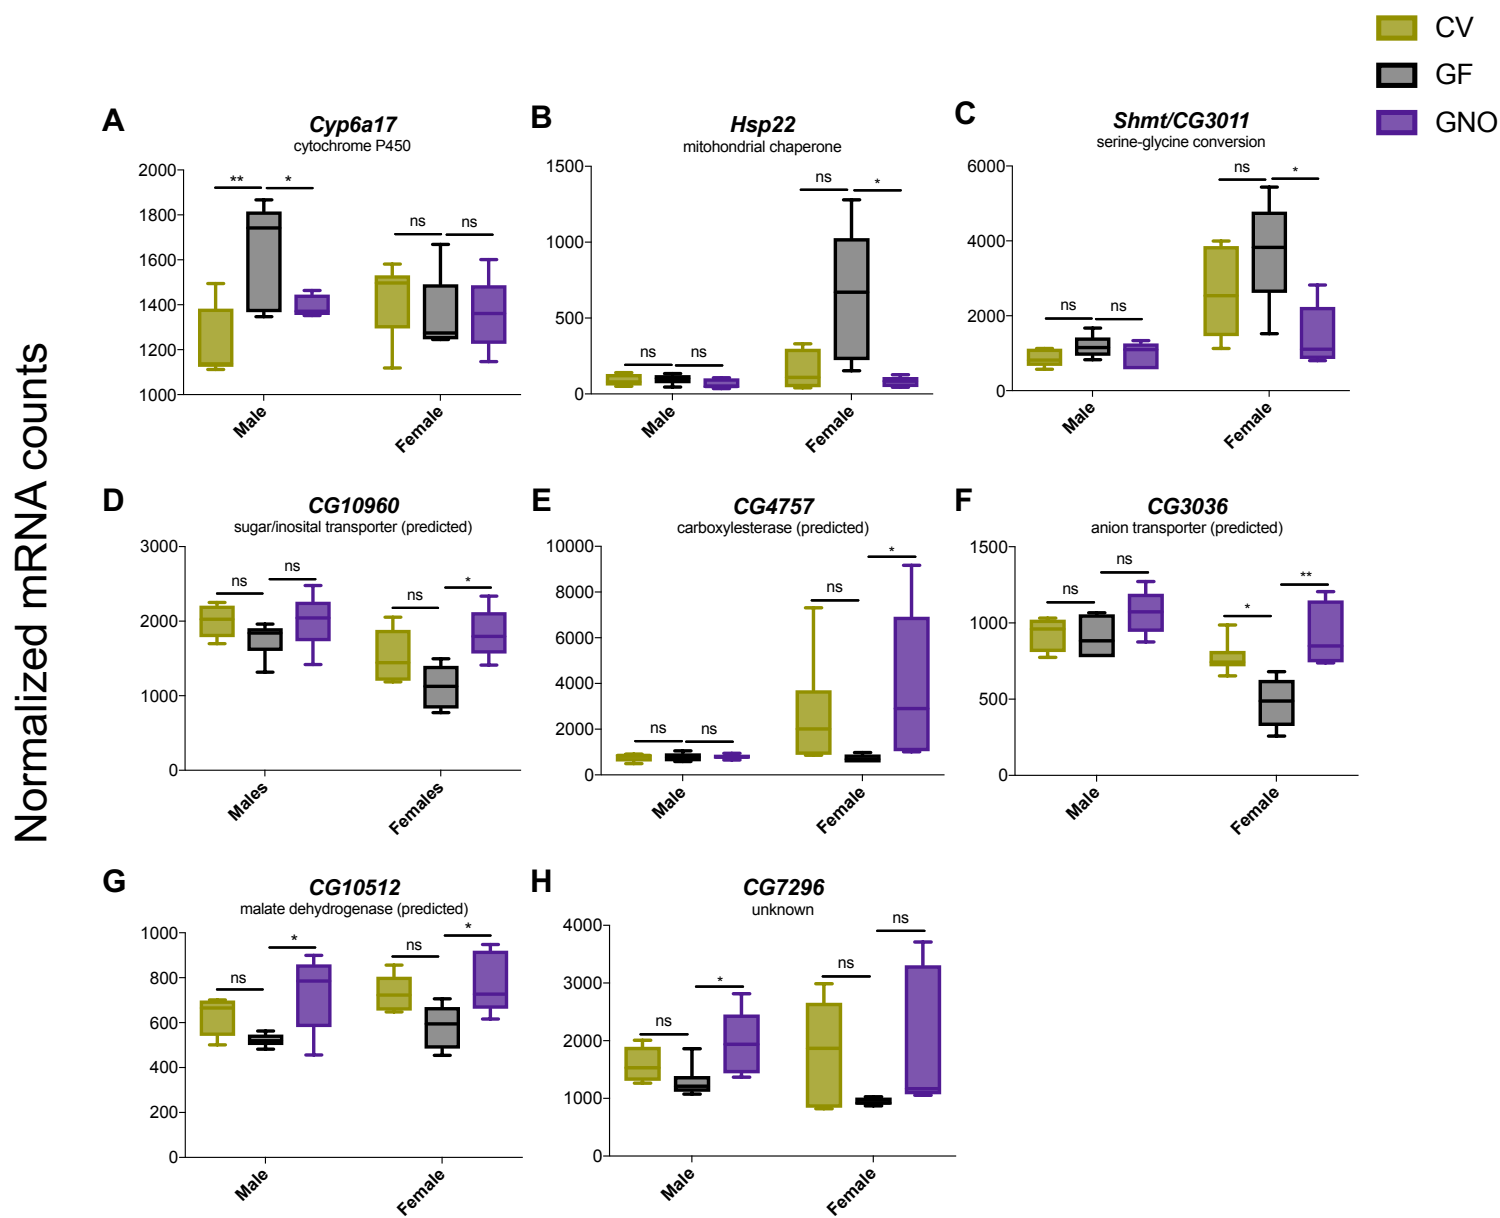



**FIGURE 5**

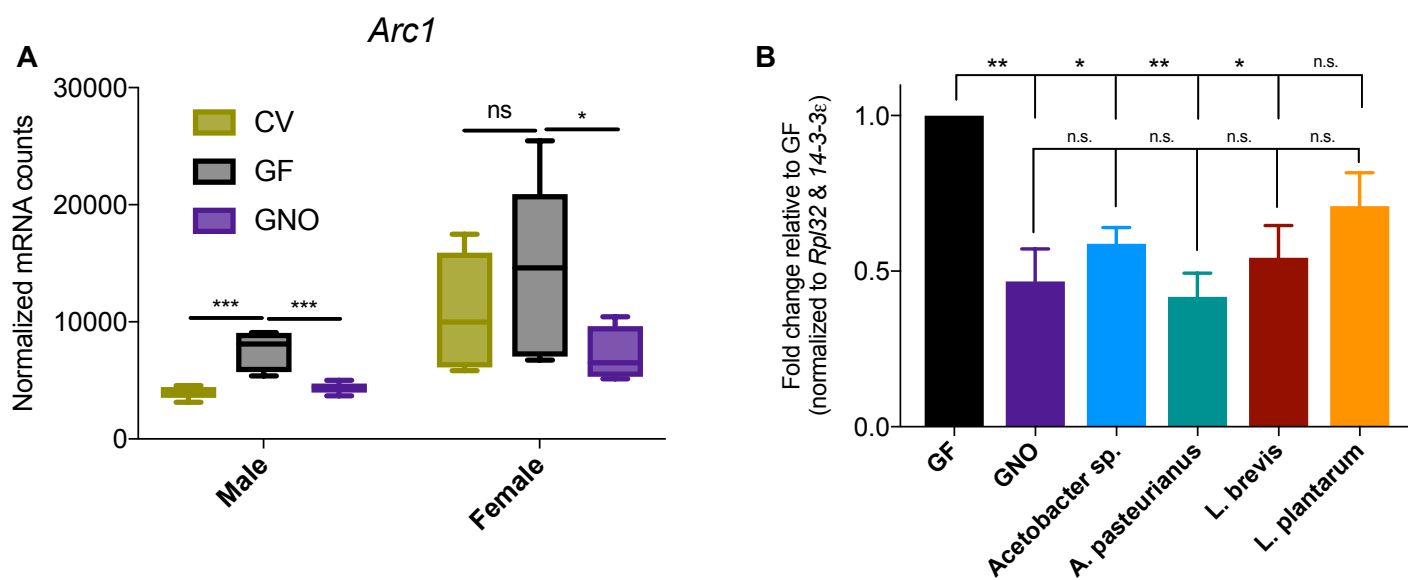

FIGURE 6

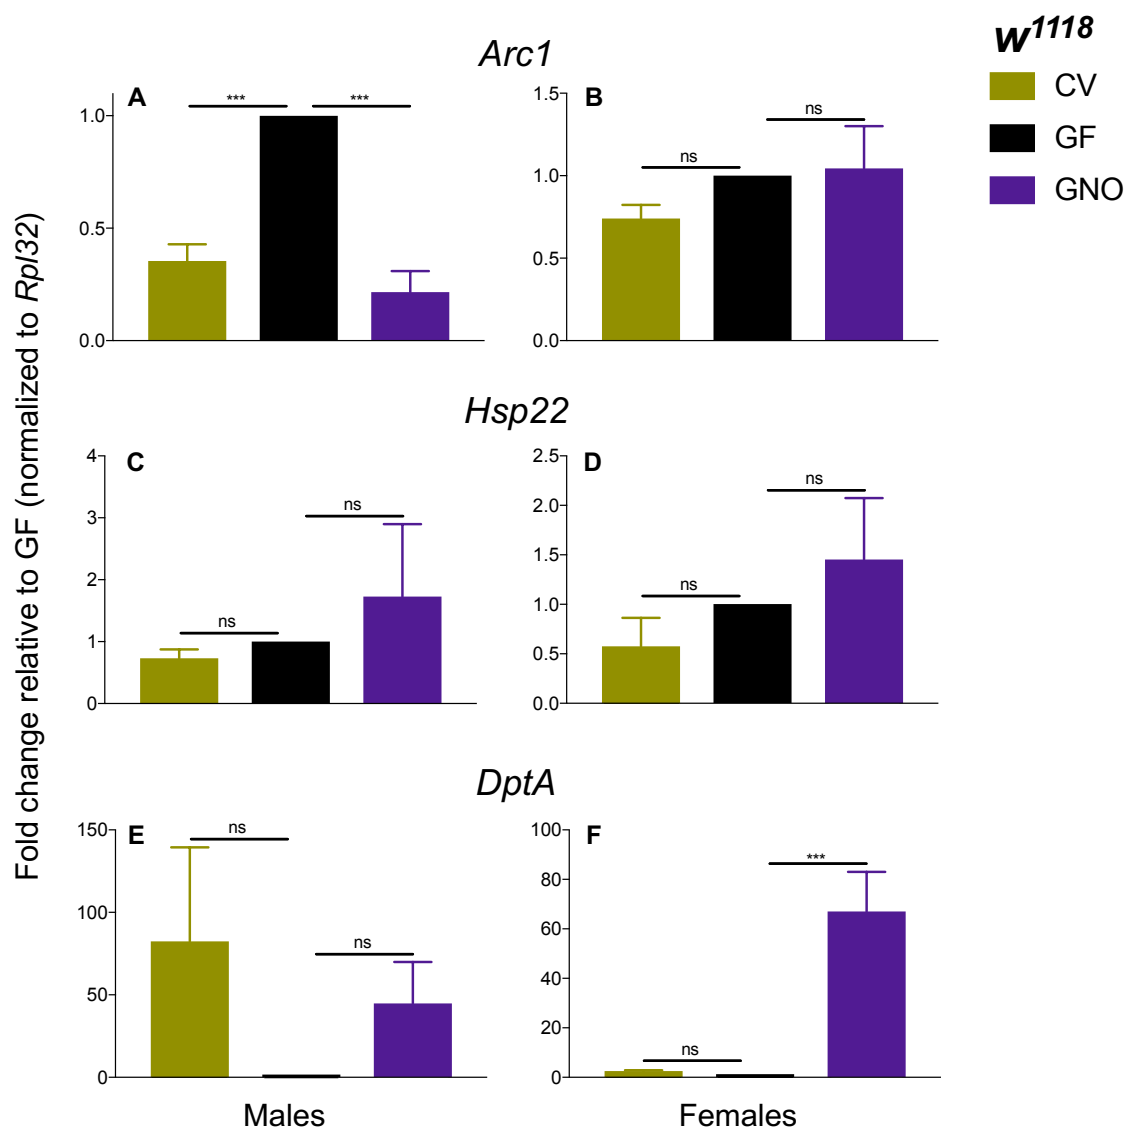

Source: https://www.biorxiv.org/content/10.1101/561043.full.pdf
